# Spindle-locked ripples mediate memory reactivation during human NREM sleep

Thomas Schreiner<sup>1</sup>, Benjamin J. Griffiths<sup>1,2</sup>, Merve Kutlu<sup>1</sup>, Christian Vollmar<sup>3</sup>, Elisabeth Kaufmann<sup>3</sup>, Stefanie Quach<sup>4</sup>, Jan Remi<sup>3</sup>, Soheyl Noachtar<sup>3</sup> & Tobias Staudigl<sup>1</sup>

1. Department of Psychology, Ludwig-Maximilians-Universität München, Germany.
2. Centre for Human Brain Health, University of Birmingham, United Kingdom.
3. Epilepsy Center, Department of Neurology, Ludwig-Maximilians-Universität München, Germany.
4. Department of Neurosurgery, University Hospital Munich, Ludwig-Maximilians-Universität München, Germany

## Abstract

Memory consolidation relies on the reactivation of previous experiences during sleep. The precise interplay of sleep-related oscillations (slow oscillations, spindles and ripples) is thought to coordinate the information flow between relevant brain areas, with ripples mediating memory reactivation. However, in humans empirical evidence for a role of ripples in memory reactivation is lacking. Here, we investigated the relevance of sleep oscillations and specifically ripples for memory reactivation during human sleep using targeted memory reactivation (TMR). Intracranial electrophysiology in epilepsy patients and scalp EEG in healthy participants revealed that elevated levels of SO-spindle activity promoted the read-out of TMR induced memory reactivation. Importantly, spindle-locked ripples recorded intracranially from the medial temporal lobe were found to be instrumental for memory reactivation to unfold during non-rapid eye movement (NREM) sleep. Our findings establish ripples as key-oscillation in human systems consolidation and emphasize the importance of the coordinated interplay of the cardinal sleep oscillations.

## 1 Introduction

2 Contemporary models propose that memory consolidation, i.e., the strengthening of  
3 memories during sleep, is achieved by reactivating experiences that were encoded during  
4 prior wakefulness<sup>1,2</sup>. Through reactivation, memories are relayed between the hippocampus  
5 and cortical long-term stores, transforming initially labile memories into long-lasting ones<sup>3</sup>.  
6 The essential communication between the hippocampus, thalamus and cortex, as well as the  
7 strengthening of memories in cortical networks, is thought to be facilitated by a precise  
8 temporal coordination between the cardinal non-rapid eye movement (NREM) sleep related  
9 oscillations, namely cortical slow oscillations (SOs), thalamocortical sleep spindles and  
10 hippocampal ripples<sup>4-6</sup>.

11 SOs (< 1 Hz), initiate time windows of excitability and inhibition not only in cortical but  
12 also in subcortical areas<sup>7-9</sup>. They ignite the generation of sleep spindles in the thalamus, which  
13 nest in the excitable upstates of cortical SOs<sup>10,11</sup>. Spindles (12 – 16 Hz), in turn, have been  
14 shown to gate Ca<sup>2+</sup> influx into dendrites, putatively facilitating synaptic plasticity in cortical  
15 areas<sup>12-14</sup>. Lastly, hippocampal sharp-wave ripples (80 – 120 Hz in humans) are assumed to  
16 coordinate neural population dynamics in the hippocampus to reactivate recently formed  
17 memories<sup>15,16</sup>. Ripples tend to occur during the excitable troughs of spindles<sup>17,18</sup>. The  
18 formation of such spindle-ripple events is thought to facilitate the transfer of reactivated  
19 memories to the cortex<sup>19,20</sup>. Hence, while SO-spindle coupling is assumed to ensure that  
20 cortical target areas are optimally tuned for synaptic plasticity when memories are reactivated,  
21 memory consolidation ultimately relies on ripples to trigger and coordinate memory  
22 reactivation processes both in the hippocampus and cortical long-term stores<sup>16</sup>.

23 Studies using intracranial recordings in epileptic patients have established the  
24 hierarchical synchronization of SOs, spindles and ripples during human NREM sleep<sup>17,21-26</sup>.  
25 However, whether spindle-locked ripples contribute to memory consolidation by mediating  
26 memory reactivation in humans is currently unknown. Here, we set out to assess the relevance  
27 of sleep oscillations and specifically sharp wave ripples for memory reactivation during human  
28 NREM sleep. We recorded scalp EEG in healthy participants and intracranial EEG in epilepsy  
29 patients while they retrieved real-world spatial memories (i.e., prior learned head orientation  
30 – image associations). Importantly, head orientations were linked to specific sound cues, which  
31 were presented again during subsequent non-rapid eye movement (NREM) sleep to trigger  
32 the reactivation of head orientation-related memories (i.e., targeted memory reactivation,  
33 TMR<sup>27</sup>). Using multivariate classification, we find that head orientation-related  
34 electrophysiological signatures are reactivated during successful awake memory retrieval as  
35 well as during TMR while participants were asleep. During sleep, elevated levels of SO-spindle  
36 activity promote the read-out of memory reactivation in both scalp and intracranial EEG  
37 recordings. Leveraging direct access to medial temporal lobe (MTL) electrophysiology in  
38 epilepsy patient, we show that spindle-locked ripples are instrumental for memory reactivation  
39 to unfold during human sleep, establishing a role of sharp wave-ripples for memory  
40 reactivation in humans.

41

## 42 Results [EEG – healthy participants]

43 Twenty-five participants (age:  $25.2 \pm 0.6$ ; 16 female) took part in the scalp EEG study.  
44 Experimental sessions started in the evening around 7 p.m. After an initial training phase (see  
45 Methods), participants performed a real-world spatial memory task, where they learned to  
46 associate 168 items (images of objects) with specific head orientations (see Fig. 1a).  
47 Importantly, a specific sound cue was assigned to each of the four non-central head  
48 orientations. After a delay filled with a distractor task, memory performance was tested in a  
49 stepwise manner. First, participants made object-recognition judgments for all old items,  
50 randomly intermixed with new items. Then, for recognized items only, participants indicated  
51 which of the four head orientations was associated with the item during the learning phase  
52 (associative retrieval, Fig. 1a). After finishing the memory task, participants went to sleep.  
53 During one hour of NREM sleep, two out of the four sounds (one sound associated with the  
54 right-sided and one with the left-sided head orientations, respectively) were repeatedly  
55 presented as TMR cues, while an additional sound, unrelated to any learning, served as a  
56 control sound. We reasoned that presenting TMR cues during sleep would ignite reactivation  
57 of the related head orientations and the associated items.

58

### 59 Behavioral results

60 To test for potential differences in memory performance between test times and TMR  
61 conditions, we conducted an ANOVA for the cued recall, including the factors cueing (cued  
62 vs. uncued) and test-time (pre- vs. post- sleep). Results indicated that memory performance  
63 declined over the course of sleep (main factor test-time:  $F_{1,24} = 19.24$ ;  $p < 0.001$ ). Importantly  
64 though, the interaction between test-time and cueing ( $F_{1,24} = 5.48$ ;  $p = 0.028$ ) was also  
65 significant, indicating that TMR did modulate memory performance. However, TMR did not  
66 benefit memory performance as expected<sup>28</sup>, but had a detrimental effect on retrieval abilities  
67 (cued pre-sleep:  $57.23 \pm 3.92\%$  vs. cued post-sleep:  $50.42 \pm 4.56\%$ ; uncued pre-sleep:  $58.76 \pm$   
68  $4.13\%$  vs. uncued post-sleep:  $54.90 \pm 4.61\%$ ; see Fig. 1b). Follow up post-hoc t-test (relative  
69 memory performance pre- to post-sleep) also indicated that uncued items were better  
70 remembered as compared to uncued items ( $t_{1,24} = 2.747$ ;  $p = 0.011$ ). For recognition memory,  
71 we neither found a significant main effect of test time ( $F_{1,24} = 0.29$ ;  $p = 0.59$ ); nor a significant  
72 interaction between test-time and cueing ( $F_{1,24} = 0.08$ ;  $p = 0.77$ ; see Supplementary Fig. 1 for  
73 details).

74

75 Head orientation-related activity is reactivated during successful retrieval.

76 Next, we set out to test whether we could decode head orientation-related activity from EEG  
77 signals during retrieval, which would allow us to track corresponding reactivation processes  
78 during TMR (see below). To extract head orientation-related patterns of neuronal activity  
79 during retrieval, we pooled the data from the associative retrieval (i.e., when participants had  
80 to remember image related head orientations) across pre- and post-sleep sessions.  
81 Furthermore, we restricted the analysis to those items whose head orientations were  
82 remembered correctly and that were selected for TMR (i.e., one left sided and one right sided

83 head orientation per participant). We performed multivariate classification (linear discriminant  
 84 analysis; LDA) on these data (Fig. 1c + d). Using fivefold cross-validation (see Methods), above-  
 85 chance classification accuracy emerged around the onset of the associative memory prompt  
 86 (time window: -30 ms to 680 ms; peak at 270 ms;  $p < 0.001$ , corrected for multiple comparisons  
 87 across time). The fact that decoding accuracies ramped up slightly before the onset of the  
 88 memory prompt indicate that associative retrieval processes putatively started already towards  
 89 the end of old / new judgements (i.e., recognition testing); see Supplementary Fig. 2  
 90 Taken together, the retrieval data allowed us to isolate brain patterns associated with the  
 91 reactivation of head orientation-related activity, which we then used to guide the analysis of  
 92 memory reactivation during TMR (for results concerning the classification of later uncued head  
 93 orientations during retrieval see Supplementary Fig. 3).  
 94

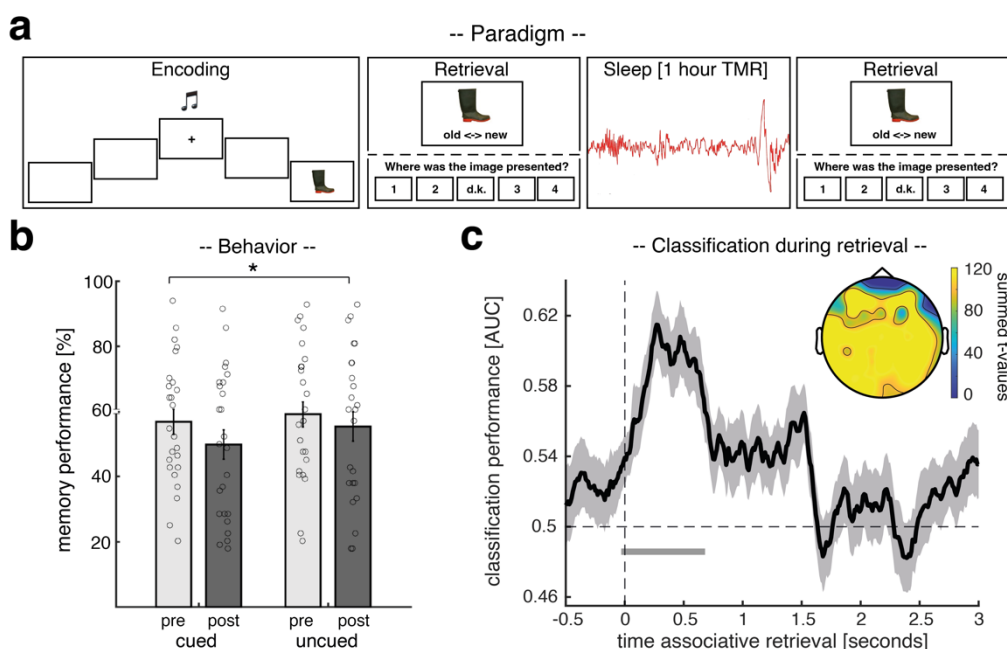

95  
 96 Fig. 1 Experimental procedure, behavioral results, and retrieval locked reactivation of head orientations. (a) During  
 97 encoding, participants were consecutively presented with 168 images (EEG study) / 144 images (intracranial EEG  
 98 study) of objects on four flanking screens (positioned at  $-60^\circ$ ,  $-30^\circ$ ,  $+30^\circ$  and  $60^\circ$  relative to the center screen).  
 99 Participants turned their head towards the relevant screen, cued by one of four orientation-specific sounds. Memory  
 100 performance was tested via a recognition test followed by an associative retrieval (this procedure was used before  
 101 and after sleep): First, participants made object-recognition judgments (old or new). Then, for recognized images  
 102 only, participants indicated which of the four head orientations was associated with the item during the learning  
 103 phase. During NREM sleep, two of the learning-related sounds (one related to left-sided and one related to right-  
 104 sided head orientation) and one control sound, which was not part of the learning material, were presented for 60  
 105 minutes. (b) Behavioral results for both experimental sessions pre- (light gray) and post-sleep (dark gray), separated  
 106 into cued and uncued trials. Bar graphs show mean ( $\pm$ SEM) percentage of recalled head orientations. Dots indicate  
 107 individual memory performance of participants (N = 25). The star denote the significant interaction (pre vs. post x  
 108 cued vs. uncued) as derived from a repeated measures ANOVA ( $F_{1,24} = 5.48$ ;  $p = 0.028$ ). (c) Later cued head  
 109 orientations (left vs. right) could be reliably decoded (above chance) from the retrieval data, starting around the  
 110 onset of the associate prompt (the black solid line indicates decoding performance ( $\pm$ SEM)). The horizontal dashed  
 111 line indicates chance level performance (i.e., 0.5). The vertical solid line indicates the onset of associative retrieval  
 112 trials (time = 0). The lower horizontal gray line shows the temporal extent of significant decoding results as derived  
 113 from a dependent-samples t-test (two-sided,  $p < 0.001$ , cluster corrected across time). The topographical insert  
 114 illustrates the results of a "searchlight decoding procedure", indicating that bilateral centro-parietal and occipital  
 115 areas exhibited stimulus-category related effects (please note that statistical tests were done for illustrative  
 116 purposes only).

117 TMR ignites reactivation of head orientation-related activity during NREM sleep.  
118 First, we tested whether TMR induced electrophysiological activity would discriminate  
119 between learning related and control sounds. Consistent with previous findings<sup>29-31</sup>, learned  
120 TMR cues, as compared to control cues, triggered a significant power increase in the SO-  
121 spindle range (i.e., an initial low frequency burst followed by a fast spindle burst;  $p < 0.001$ ,  
122 corrected for multiple comparisons across time, frequency, and space; see Fig. 2a),  
123 foreshadowing that learning-related TMR cues might have triggered relevant neuronal  
124 processing in the sleeping brain.

125 To specifically test this, we next determined whether neuronal activity related to  
126 remembered head orientations would be reactivated during TMR. We first trained a classifier  
127 on the pooled associative retrieval data from both pre- and post-sleep sessions [-0.5 to 1 s].  
128 The resulting training weights were then applied on the TMR data [-0.5 to 1.5 s]. Classifier  
129 testing labels reflected the stimulus categories used in the retrieval sessions (left- or right-  
130 sided head orientation), such that above-chance classification hallmarks TMR related activation  
131 patterns more strongly resembling the related stimulus category than the alternative stimulus  
132 category. As shown in Fig. 2b, results revealed significant above-chance classification from 930  
133 to 1410 ms relative to TMR onset ( $p = 0.023$ , corrected for multiple comparisons across time),  
134 emerging during the presence of sleep spindles (associative retrieval time-window: -110 to 330  
135 ms; the fact that decodability preceded the onset of the associative memory prompt again  
136 indicates that associative retrieval processes were probably ignited during the preceding  
137 recognition memory test). Applying the decoding procedure to source-space data revealed  
138 that these effects might have originated from fronto-parietal networks and the right medial  
139 temporal lobe (including entorhinal cortex, parahippocampus and hippocampus; see Fig. 2c).  
140 Finally, we asked whether the oscillatory fingerprint of TMR in the SO-spindle range (Fig. 2a)  
141 would be instrumental for TMR triggered memory reactivation to unfold. To address this  
142 question, we correlated, across participants, TMR triggered power (averaged across the cluster  
143 shown in Fig. 2a) and levels of mean classification performance (averaged across the cluster  
144 shown in Fig. 2b). As shown in Fig. 2d, we observed a significant positive relationship between  
145 the two variables ( $\rho = 0.50$ ,  $p = 0.01$ ; for classification results based on TMR trials exhibiting  
146 increased levels of activity in the SO-spindle range see Supplementary Fig. 4).

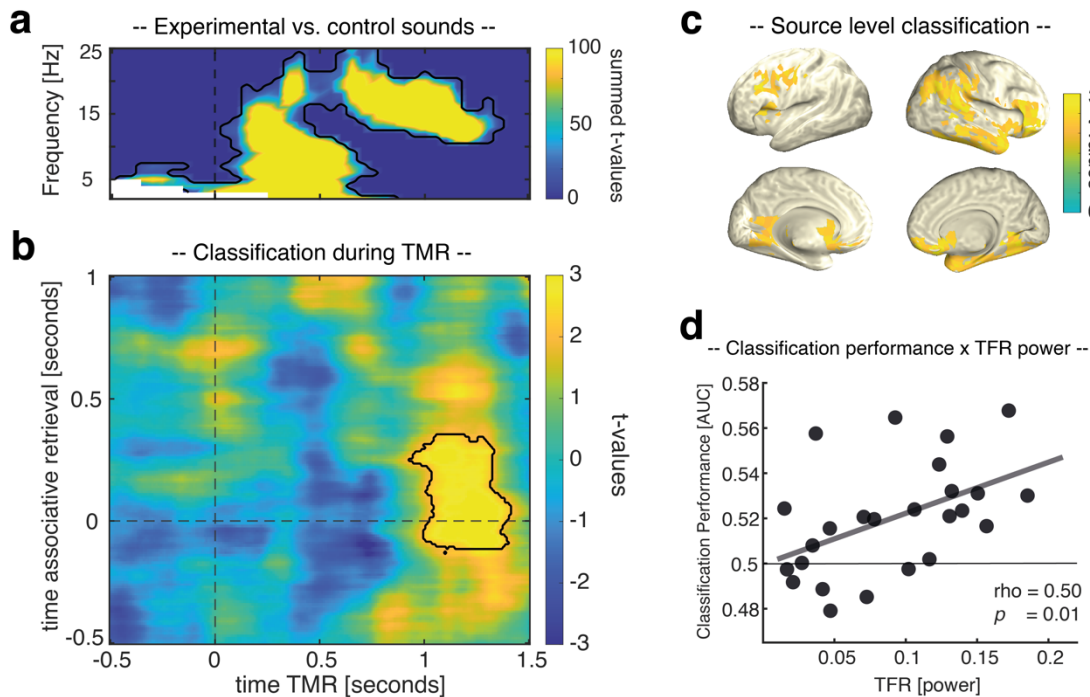

147  
148 Fig. 2 Reactivation of head orientation-related activity during TMR. (a) Power difference between learning-related  
149 TMR cues versus new control cues after statistical thresholding ( $p < 0.001$ , corrected) (b) Retrieval-related brain  
150 patterns (left vs. right head orientations) were decodable during TMR (contour lines indicate the extent of the  
151 cluster,  $p = 0.023$  corrected; color range (blue to yellow) represents t values against chance level performance. (c)  
152 The source plots illustrate the results of a "searchlight decoding procedure", indicating that fronto-parietal  
153 networks and the right medial temporal lobe exhibited head orientation related effects (please note that statistical  
154 tests were done for illustrative purposes only). (d) classification performance correlated positively with TMR  
155 triggered power ( $r = 0.50$ ,  $p = 0.01$ ).

156

## 157 Results [intracranial EEG - patients]

158 Ten patients (age:  $31.20 \pm 3.46$ ; 7 female) took part in the intracranial EEG (intracranial EEG)  
159 study. Overall, the procedures of the experiment were highly similar to the above-described  
160 scalp EEG study but optimized for patients in a clinical setting (e.g., reduced trial number in  
161 the memory task, memory task was split into three consecutive blocks; see Methods for  
162 details).

163

### 164 Behavioral results

165 First, we tested whether the effects of TMR on memory performance, as reported above, would  
166 replicate in the patient sample. Hence, we again tested for differences in memory performance  
167 between test times and TMR conditions by conducting an ANOVA for the cued recall (factors:  
168 cueing (cued vs. uncued) and test-time (pre- vs. post- sleep)). Results revealed that patients'  
169 memory performance also declined over the course of sleep (main factor test-time:  $F_{1,9} = 32.0$ ;  
170  $p < 0.001$ ), comparable to the healthy participants' decline. As in the healthy sample, we found  
171 a significant interaction between test-time and cueing ( $F_{1,9} = 8.28$ ;  $p = 0.018$ ), indicating that  
172 TMR did modulate memory performance by exerting a detrimental effect on retrieval abilities  
173 (cued pre-sleep:  $58.47 \pm 6.02\%$  vs. cued post-sleep:  $42.36 \pm 4.89\%$ ; uncued pre-sleep:  $58.88 \pm$   
174  $5.60\%$  vs. uncued post-sleep:  $49.58 \pm 5.73\%$ ; see Fig. 3a). While the post-hoc t-test (relative  
175 change for cued vs. uncued) did not turn out to be significant ( $t_{1,9} = 1.97$ ;  $p = 0.08$ ), we would

176 still like to emphasize that the overall pattern of behavioral results is highly similar to those of  
177 the healthy population. For recognition memory, there was neither a significant main effect of  
178 test time ( $F_{1,9} = 0.06$ ;  $p = 0.08$ ); nor a significant interaction between test-time and cueing ( $F_{1,9}$   
179  $= 2.25$ ;  $p = 0.16$ ; see Supplementary Fig. 5 for details).

180

181 iEEG confirms reactivation of head orientation-related activity during successful retrieval.

182 Next, we assessed whether the intracranial data would reveal evidence for the reactivation of  
183 head orientation-related activity during retrieval, similar to the results of the scalp EEG study  
184 (see Supplementary Fig. 6 for electrode coverage of intracranial EEG recordings). Again, the  
185 associative retrieval data was pooled across pre- and post-sleep sessions, and multivariate  
186 classification (LDA) was restricted to correctly remembered items whose associated head  
187 orientations were cued during sleep (i.e., one left sided and one right sided head orientation  
188 per patient). Using fivefold cross-validation (see Methods), significant above-chance  
189 classification accuracy emerged after the onset of the associative retrieval prompt (peak at 250  
190 ms;  $p = 0.019$ , corrected for multiple comparisons across time, see Fig. 3b). Hence, similar to  
191 scalp EEG recordings, multivariate classification during retrieval using intracranial EEG activity  
192 allowed us to isolate brain patterns associated with the reactivation of head orientation-related  
193 activity.

194

195 TMR triggered reactivation of head orientation-related activity is accompanied by elevated  
196 levels of SO-spindle and ripple activity.

197 In a first step, we tested whether TMR triggered power would also distinguish between  
198 learning related and control sounds using intracranial EEG recordings (based on frontal,  
199 parietal and temporal contacts). In line with the results of the scalp EEG study, learned TMR  
200 cues, as compared to control cues, elicited a significant power increase in in the SO-spindle  
201 range (low frequency cluster:  $p < 0.001$ ; spindle cluster:  $p < 0.001$ ; corrected for multiple  
202 comparisons across time and frequency, Fig. 3d).

203 SO-spindles have long been implicated in coordinating the emergence of  
204 hippocampal ripples and hippocampal–cortical interactions<sup>17,21,22,24,32</sup>. Hence, we next tested  
205 whether different levels of cortical SO-spindle activity would influence the emergence of  
206 ripples in the medial temporal lobe (MTL). First, ripples were extracted (7 patients, 14 contacts)  
207 based on established criteria<sup>18</sup> (see Methods for details; see Fig. 3c). Then, to investigate  
208 whether activity in the SO-spindle range would affect the emergence of ripples, we sorted  
209 TMR trials as a function of power in the TFR related SO-spindle cluster (Fig. 3e) and divided  
210 the trials using a median split (see Supplementary Fig. 7 for TFR differences between high and  
211 low SO-spindle activity trials). Next, we created peri-event histograms (bin size = 50 ms) of  
212 ripple events time-locked to TMR cues for trials exhibiting high and low activity in the SO-  
213 spindle range, respectively. As shown in Fig. 3e, ripple density differed significantly between  
214 conditions ( $p = 0.023$ ; corrected for multiple comparisons across time), with MTL ripples  
215 specifically peaking during elevated spindle activity (i.e., 1100 – 1250 ms after reminder cue  
216 onset; also see Supplementary Fig. 8). However, overall ripple number did not differ between



217 high and low SO-spindle activity trials (high SO-spindle trials:  $66.57 \pm 10.57$ , low SO-spindle  
218 trials:  $70.35 \pm 10.64$ ,  $t_{(13)} = -1.1$ ,  $p = 0.28$ ), indicating that SO-spindle activity coordinates the  
219 temporal occurrence of ripples rather than their overall number.

220         Given that the interaction between SO-spindles and ripples has been tightly linked to  
221 memory reactivation and the behavioural expressions of memory consolidation in rodents<sup>33,34</sup>,  
222 we determined whether TMR-triggered reactivation of head orientation-related activity would  
223 be specifically traceable in trials where the probability for SO-spindles and concomitant ripples  
224 would be high. Hence, a classifier was trained on the pooled associative retrieval data from  
225 both pre- and post-sleep sessions [-0.5 to 1s] and tested on the TMR data [-0.5 to 1.5 s],  
226 separately for high SO-spindle activity trials and for low SO-spindle activity trials. The resultant  
227 classification performance outcomes were contrasted (see Methods for details). We found a  
228 cluster of significant classification from 960 to 1410 ms relative to TMR onset ( $p = 0.019$ ,  
229 corrected for multiple comparisons across time, retrieval time-window [-150 to 200 ms]; Fig. 3f;  
230 see Supplementary Fig. 9 for results of testing high- and low SO-spindle activity trials against  
231 chance-levels and classification results for all TMR segments irrespective of SO-spindle  
232 activity). These results indicate that (i) TMR-induced reactivation is related to remembered  
233 head orientations and that (ii) reactivation was putatively mediated by SO-spindle and ripple  
234 activity. We examine the relation between ripples and memory reactivation in more depth in  
235 the next section.

236

237

238

239

240

241

242

243

244

245

246

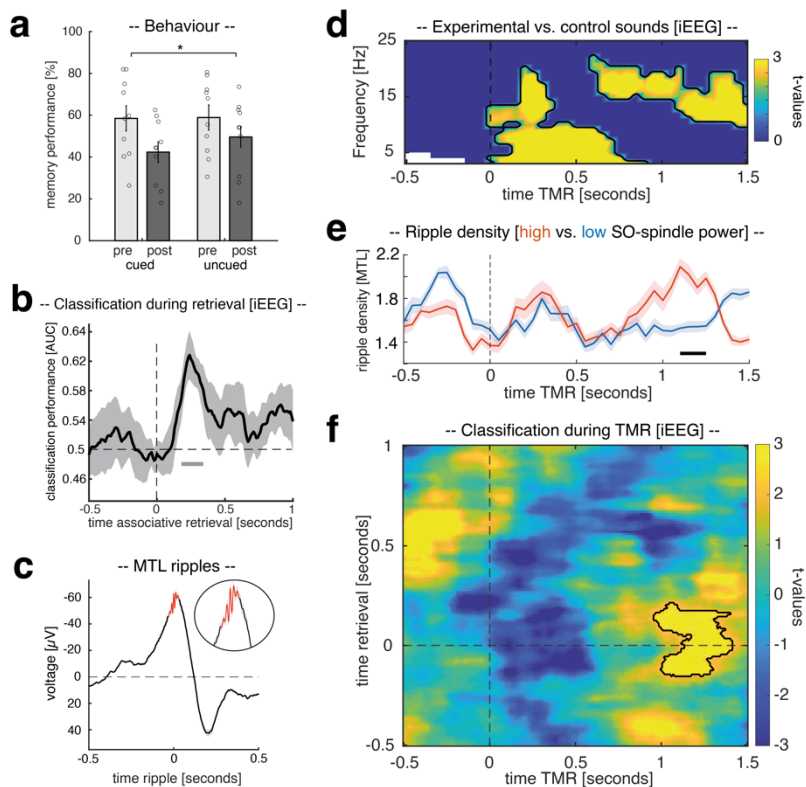

247  
 248 Fig.3 intracranial EEG study. (a) Behavioral results for both experimental sessions pre- (light gray) and post-sleep  
 249 (dark gray), separated into cued and uncued trials. Bar graphs show mean ( $\pm$ SEM) percentage of recalled head  
 250 orientations. Dots indicate individual memory performance of participants ( $N = 10$ ). The star denotes the significant  
 251 interaction (pre vs. post  $\times$  cued vs. uncued) as derived from a repeated measures ANOVA ( $F_{1,9} = 8.28$ ;  $p = 0.018$ ). (b)  
 252 Later cued head orientation (left vs. right) could be reliably decoded (above chance) from the retrieval data, starting  
 253 around 190 ms after the onset of the associate prompt (the black solid line indicates decoding performance  
 254 ( $\pm$ SEM)). The horizontal dashed line indicates chance level performance (i.e., 0.5). The vertical solid line indicates  
 255 the onset of associative retrieval trials (time = 0). The lower horizontal gray line shows the temporal extent of  
 256 significant decoding results as derived from a dependent-samples t-test (two-sided,  $p = 0.019$ , cluster corrected  
 257 across time). (c) Ripple-triggered grand average over all detected ripples (7 patients, 14 contacts; locked to maximal  
 258 negative amplitude) during TMR (-.5 to 1.5 seconds;  $138.78 \pm 21.72$  ripples in  $231.14 \pm 19.94$  trials). A zoomed  
 259 version of the ripples is illustrated in the lower inset. The right inset shows the power spectral density (PSD) averaged  
 260 across all detected SWRs [ $\pm 300$  ms] indicating distinct peaks in the SO/delta, spindle and ripple range (i.e., 3 Hz,  
 261 14 Hz and 84 Hz). (d) Power difference indicate that retrieval-related TMR cues triggered increased power in  
 262 intracranial EEG recordings ( $p < 0.05$ , corrected) as compared to control cues. (e) Ripple density for trials exhibiting  
 263 high (red) and low power (blue) in the SO-spindle range, respectively. Ripple density differed significantly between  
 264 conditions ( $p = 0.023$ ; corrected), with MTL ripples peaking during elevated spindle activity. (f) Head orientation-  
 265 related brain patterns (left vs. right) were decodable during TMR when contrasting high and low SO-spindle activity  
 266 trials (contour lines indicate the extent of the cluster,  $p = 0.019$  corrected; color range (blue to yellow) represents  $t$   
 267 values against chance level performance.

268

269 Spindle-locked MTL ripples facilitate memory reactivation.

270 Having established that cardinal sleep oscillations and reactivation of head orientation-related  
 271 activity co-occur in time, we next assessed whether ripples and their coupling to spindles  
 272 would be essential for triggering reactivation processes. First, we tested whether the phase of  
 273 spindles in cortical contacts would impact ripple band activity in MTL contacts when ripples  
 274 emerged during the presence of spindles (i.e., 700 to 1400 ms after cue onset; for details see  
 275 Methods) using the Modulation Index<sup>35</sup>. In line with previous findings, results revealed that the  
 276 phase of sleep spindles robustly influenced the amplitude in the ripple range<sup>17,21</sup> ( $\sim 80 - 120$   
 277 Hz;  $p = 0.005$ , corrected for multiple comparisons across frequencies; see Fig. 4a). The phase

278 of cortical delta/theta activity also exhibited a significant effect on ripple activity<sup>36</sup> ( $p = 0.007$ ,  
279 corrected for multiple comparisons across frequencies), while spindle phases additionally  
280 modulated low gamma in the MTL (~20 – 40 Hz;  $p < 0.001$ , corrected for multiple comparisons  
281 across frequencies). When assessing the preferred phase of spindles for their grouping of  
282 ripples, we found that ripples were nested towards the trough of cortical spindles (Fig. 4a inset;  
283 V-test against  $\pm \pi$ :  $V = 5.29$ ,  $p = 0.022$ ; mean coupling direction:  $-176.67 \pm 16.61^\circ$ ; mean vector  
284 length =  $0.21 \pm 0.031$ )<sup>17,21</sup>.

285 Finally, we asked whether spindle-locked ripples would be instrumental for memory  
286 reactivation to unfold. Hence, again a classifier was trained on the pooled associative retrieval  
287 data from both pre- and post-sleep sessions [-0.5 to 1s], but the resulting training weights  
288 were this time specifically applied on intracranial EEG segments centered around spindle-  
289 locked MTL ripples (i.e., were MTL ripples were paralleled by cortical spindles in between 700  
290 and 1400 ms). For statistical evaluation, surrogate decoding performance was calculated by  
291 centering intracranial EEG segments around time-points where no ripple was present during  
292 the time-window of preferred spindle-ripple interactions (i.e., 700-1400 ms after cue onset).  
293 This procedure was repeated 100 times and resulting surrogate performance values were then  
294 averaged, providing baseline values for each participant under the null hypothesis that spindle  
295 locked ripples would not be relevant for the classification of stimulus categories. We found a  
296 ripple - locked cluster of significant above-chance classification from - 100 to 200 ms relative  
297 to ripple centers, indicating that ripples might be indeed facilitating memory reactivation  
298 during NREM sleep in humans ( $p = 0.007$ , corrected for multiple comparisons across time,  
299 associative retrieval time-window [-120 to 230 ms], Fig. 4b; see Supplementary Fig. 10 for  
300 contrasting ripple triggered classification against chance-level; see Supplementary Fig. 11 for  
301 results indicating that uncoupled ripples (i.e., ripples without spindles) did not facilitate  
302 multivariate classification).

303  
304  
305  
306  
307  
308  
309  
310  
311  
312  
313

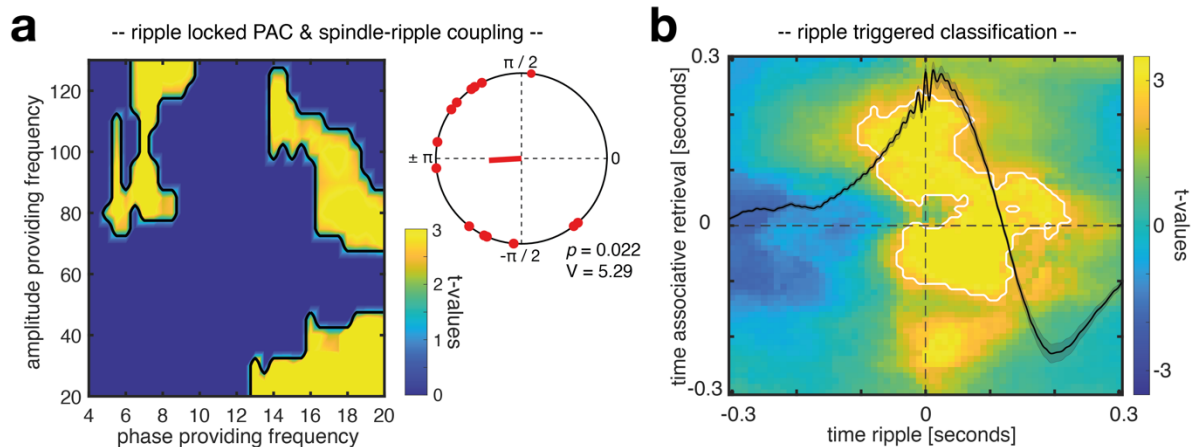

314  
315

316 Fig.4 Spindle-ripple interactions and ripple locked classification. (a) Assessing phase-amplitude coupling (PAC)  
317 using the Modulation Index revealed that the phase of cortical spindles influenced amplitudes in the ripple range  
318 in MTL contacts (~ 80 – 120 Hz;  $p = 0.005$ , corrected). In addition, cortical delta/theta phase exhibited a significant  
319 effect on MTL ripple amplitudes ( $p = 0.007$ , corrected), while the spindle phase additionally modulated low gamma  
320 amplitudes in the MTL (~20 – 40 Hz;  $p < 0.001$ , corrected). The inset illustrates phases of the spindle-ripple  
321 modulation, indicating a clustering of ripples towards spindle troughs (corresponding to  $\pm\pi$ ; V test against  $\pm\pi$ :  
322  $v = 5.29$ ,  $p = 0.022$ ; mean coupling direction:  $-176.67 \pm 16.61^\circ$ , mean vector length =  $0.21 \pm 0.031$ ). (b) Head  
323 orientation-related brain patterns (left vs. right) were decodable during the presence of spindle locked MTL ripples  
324 (contour lines indicate the extent of the significant cluster,  $p = 0.007$  corrected; color range (blue to yellow)  
325 represents t values).

326

## 327 Discussion

328 Our results unveil a key role of spindle-locked ripples in human sleep-based memory  
329 reactivation. Specifically, we found that ripples in the MTL, when coupled to cortical spindles,  
330 initiate the reprocessing of memories during human NREM sleep, as evidenced by the  
331 multivariate classification of prior retrieved head-orientations. These findings elucidate the  
332 neural processes mediating memory reactivation during human NREM sleep, by establishing  
333 MTL ripples and their synchronization with cortical sleep rhythms as a crucial cornerstone of  
334 memory consolidation.

335

336 In current models of memory consolidation, ripples are generally considered to be  
337 electrophysiological markers of memory reactivation, as they have been suggested to trigger  
338 the reprocessing of memories during sleep<sup>1,20,37</sup>. To date, however, direct evidence for a core  
339 contribution of ripples to sleep's memory function has been lacking in humans. We here used  
340 multivariate classification to detect human reactivation processes that are timed by ripples  
341 identified in the MTL, providing strong support that ripples in humans initiate memory  
342 reactivation akin to animal models<sup>6,16,38</sup> and presumably the transfer of memories between the  
343 hippocampus and cortical long-term store.

344 But are all ripples related to memory reactivation? Our data suggest that only a fraction  
345 of ripples, specifically those coupled to cortical spindles, were driving the decodability of prior  
346 retrieved head-orientations (Fig. 4b and Supplementary Fig. 11). Spindles are well known to  
347 group ripples in the MTL<sup>19,21–23</sup> (Fig. 4a). They have also been shown to induce neural plasticity  
348 in cortical target sites<sup>13,14,39</sup>, ensuring that those areas are optimally tuned for long-term

349 storage when reactivated memory information arrives<sup>1</sup>. Hence, our finding that spindle-locked  
350 ripples were key for detecting memory reactivation confirms longstanding theoretical  
351 predictions concerning the role of synchronized spindle-ripple activity for memory  
352 consolidation<sup>20,37,40</sup>

353 Moreover, we show that elevated levels of SO-spindle activity promoted the read-out  
354 of memory reactivation in both scalp and intracranial EEG recordings. The precise interplay  
355 between SOs and spindles is believed to regulate the flow of information between the  
356 hippocampus and cortical long-term stores, with SO up-states establishing a time window for  
357 spindles and ripples to coincide<sup>22</sup>. In addition, earlier studies in healthy participants using  
358 scalp EEG established SO-spindles as a necessary pre-requisite for the identification of  
359 memory reactivation<sup>18,41,42</sup>. However, because the poorly conducting skull low-pass filters the  
360 scalp EEG<sup>43</sup>, these data remained agnostic to the role of high-frequency signals such as ripples  
361 and their potential role in memory reactivation. On basis of our results that ripples in the MTL  
362 peaked during the presence of spindles in trials exhibiting high SO-spindle activity (Fig. 3e),  
363 while spindle-locked ripples were driving memory reactivation (Fig. 4b), we suggest that also  
364 in these previous studies ripples were unbeknownst driving the decodability of prior learned  
365 material during SO-spindles.

366 In the present paradigm, real-world head orientation acted as spatial context in an  
367 episodic memory task. By showing that real-world head orientation-related activity is  
368 reactivated during successful retrieval and sleep, our findings add ecological validity to prior  
369 work on the reactivation of memory contexts<sup>44-46</sup>. These findings are important because they  
370 indicate that the neural correlates of memory functions generalize from screen-based  
371 laboratory settings to more naturalistic behavior incorporating bodily movements<sup>47</sup>. The  
372 standard approach to studying the neural basis of human memory requires participants to  
373 display minimal bodily movements (e.g., fMRI, MEG), preventing the generation of many self-  
374 referential cues, which are thought to play a crucial role in the neural mechanisms underlying  
375 memory<sup>47,48</sup>. The present approach circumvents these shortcomings by incorporating real-  
376 world head rotations that trigger self-referential cues such as motor commands, efference  
377 copies and reafferent feedback. Combining this approach with rare intracranial recordings  
378 from core memory regions (e.g., MTL) opens up exciting opportunities to investigate human  
379 electrophysiology that would otherwise remain concealed<sup>47,49,50</sup>.

380 On a neural level, little is known about how the human brain tracks and maintains  
381 information about real-world head orientation<sup>but see 50</sup>. Animal research, on the other hand, has  
382 successfully identified neurons that act as a neural compass during spatial navigation<sup>51-54</sup>.  
383 During sleep, this neural compass seems to be preserved<sup>55,56</sup>. By simultaneously recording  
384 hippocampal ripples and activity from thalamic head direction cells in rodents, Viejo &  
385 Peyrache<sup>57</sup> showed a specific coupling of the two signals in sleeping rodents that might guide  
386 the replay of previously experienced trajectories (even though memory reactivation was not  
387 explicitly assessed in their study)<sup>57</sup>. Our results demonstrating ripple-locked memory  
388 reactivation connect to these findings on a conceptual level, by showing that ripples trigger  
389 reactivation of memory contexts (i.e., head orientations) that might guide the reactivation of

390 previously experienced events. Going beyond previous work in animal models, we here show  
391 that head orientation acts as a memory context in an episodic memory task. Note, however,  
392 that the here presented intracranial and surface EEG operate on a meso-/macro scale,  
393 compared to the micro scale of single unit recordings. While recent studies have identified a  
394 population-level code for real-world head direction<sup>50,58,59</sup>, future work is necessary to connect  
395 the different levels, see e.g.<sup>60</sup>. On a more general level, implementing real-world navigation  
396 into memory paradigms is challenging, but at the same time promises to build bridges  
397 between animal research investigating real-world spatial navigation and studies investigating  
398 memory processes in humans. Assuming that memory and navigation share neural  
399 mechanisms, converging experimental approaches could ultimately foster our understanding  
400 of the underlying neural codes in animals and humans<sup>61</sup>.

401 We here used TMR as an experimental tool to trigger memory reactivation during sleep. It has  
402 been shown that TMR modulates memory leading most often to performance increases<sup>28,62-66</sup>.  
403 Hence, it might seem surprising that TMR did not benefit but deteriorate memory  
404 performance both in healthy participants as well as in patients. However, a growing number of  
405 studies report TMR-induced impairments, in particular when several targets were associated  
406 with a given TMR cue<sup>30,67,68</sup>. In the present study, multiple images (42 in the scalp EEG study;  
407 36 in the intracranial EEG study) were associated with each of the four head orientations. It has  
408 been suggested that if the associations between multiple targets and one cue vary in strength,  
409 TMR might elicit the reactivation of targets most strongly associated with the cue<sup>67</sup>, akin to  
410 models describing retrieval competition during wake<sup>69,70</sup>. Selectively strengthening a subset  
411 of strong cue-target associations via TMR, however, might lead to weakly associated targets  
412 losing the competition for being reactivated during a subsequent memory test. Depending on  
413 the relative amount of cue-target associations in either subset, this might show as a net  
414 beneficial, detrimental, or no effect of TMR on memory performance. Interestingly, in an  
415 exploratory analysis (see Supplementary Fig. 12), we found a positive correlation between  
416 memory confidence in the pre-sleep memory test and the effect of TMR. Assuming that  
417 confidence ratings in our study are positively related to memory strength<sup>71,72</sup>, but see<sup>73</sup>, this  
418 relationship indicates that TMR may have mainly reactivated targets that were strongly  
419 associated with their cues and further strengthened their association. In turn, these strong  
420 targets might have outcompeted weaker ones when competing for being retrieved during  
421 post-sleep retrieval, resulting in the observed detrimental effect of TMR on memory  
422 performance.

423 To conclude, using invasive and non-invasive human electrophysiology we found an  
424 intimate relationship between NREM sleep related oscillations and memory reactivation. Our  
425 findings provide evidence in favor of current models of systems-level consolidation in humans,  
426 where spindle-locked ripples synchronize neural population dynamics to reactivate previously  
427 formed memories. They establish MTL ripples and their synchronization with cortical sleep  
428 rhythms as crucial cornerstones of memory consolidation in humans.

429  
430

## 431 Methods

432

### 433 Participants

434 25 healthy, right-handed participants (mean age:  $25.2 \pm 0.6$ ; 16 female) with normal or  
435 corrected-to-normal vision took part in the EEG experiment. An additional 14 participants had  
436 to be excluded due to insufficient sleep or technical problems. The sample size was  
437 determined in accordance with previous human sleep and memory studies (e.g., <sup>74–76</sup>). Pre-  
438 study screening questionnaires (including the Pittsburgh Sleep Quality Index (PSQI <sup>77</sup>), the  
439 morningness–eveningness questionnaire <sup>78</sup>, and a self-developed questionnaire querying  
440 general health status and the use of stimulants) indicated that participants did not take any  
441 medication at the time of the experimental session and did not suffer from any neurological  
442 or psychiatric disorders. All participants reported good overall sleep quality. Furthermore, they  
443 had not been on a night shift for at least 8 weeks before the experiment. All participants were  
444 instructed to wake up by 7 a.m. and avoid alcohol the evening before and caffeine on the day  
445 of the experimental sessions. They received course credit or financial reimbursement in return  
446 for their participation. All participants gave written informed consent after being informed  
447 about the details of the study. The study was approved by the ethics committee of the  
448 Department of Psychology (Ludwig–Maximilian Universität Munich).

449

450 For the intracranial EEG study, 10 patients from the Epilepsy Center, Department of  
451 Neurology, Ludwig–Maximilian Universität (Munich, Germany), all suffering from medically  
452 intractable epilepsy, volunteered (7 female; age:  $31.20 \pm 3.46$ ). An additional four patients had  
453 to be excluded due to technical difficulties. The study was approved by the ethics committee  
454 of the Medical Faculty of the Ludwig–Maximilian Universität.

455

### 456 Stimuli and procedures

457 *Overview.* On experimental days participants arrived at the sleep laboratory at 7 p.m. The  
458 experimental session started with the set-up for polysomnographic recordings during which  
459 electrodes for electroencephalographic (EEG) and electrooculography (EOG) were applied.  
460 Several days prior to the experimental session, participants were habituated to the  
461 environment by having an adaptation nap in the sleep laboratory. At around 8 p.m. the  
462 experiment started with a training task, followed by the memory task (for details see Training  
463 and Memory Task below). The sleep period began at ~11 p.m. and all participants slept for ~7  
464 h (for sleep characteristics see Supplementary Tables 1). During NREM sleep (sleep stages N2  
465 and SWS), some of the animal sounds, which were presented before during the training and  
466 the memory task were presented again for 60 minutes (see Targeted memory reactivation for  
467 details). Participants were awoken after 6 to 7 hours of sleep from light sleep (sleep stage N1  
468 or N2) and after 15 min of recovery and memory performance was tested again (see  
469 Supplementary Table 1 for sleep characteristics).

470 For the intracranial EEG study the general approach was largely similar. Experimental  
471 procedures were arranged around the clinical routines. Specifically, the training sessions were

472 executed during daytime, while the memory task was employed after dinner (i.e., starting  
473 between ~6-7 pm). Patients went to sleep between 10 and 12 p.m. and slept for ~7 h (for sleep  
474 characteristics see Supplementary Tables 2). As with the EEG study, animal sounds were  
475 presented for 60 minutes during NREM sleep. Post-sleep memory performance was tested the  
476 next morning (see Supplementary Table 2 for sleep characteristics).

477

478 *Stimuli.* A set of in total 336 images of objects and five animal sounds (i.e., a cow's moo, a  
479 parrot's squawk, a cat's meow, a sheep's baa, a cuckoo's sound) served as experimental  
480 stimuli. Objects were images of animals, food, clothing, tools, or household items presented  
481 on a plain white back- ground. All images were taken from <sup>79</sup>.

482

483 *Experimental tasks.* For the recording of behavioral responses and the presentation of all  
484 experimental tasks, Psychophysics Toolbox Version 3 <sup>80</sup> and MATLAB 2018b (MathWorks,  
485 Natick, USA) were used. Responses were made via keyboard presses on a dedicated PC.  
486 Across all experimental phases, presentation order of stimuli was randomized across  
487 participants / patients.

488

489 *Training.* Participants / patients began by fixating on the center screen, where a fixation cross  
490 was presented for  $1.5 \pm 0.1$  seconds. The cross disappeared and one of four animal sounds  
491 was played (600 ms). Subsequently, the cross appeared on one of four flanking screens  
492 (positioned at  $-60^\circ$ ,  $-30^\circ$ ,  $+30^\circ$  and  $60^\circ$  relative to the center screen, duration: 2.5 seconds, see  
493 Fig. 1a). Four of the total five sounds were randomly chosen at the start of the experiment and  
494 randomly assigned to a single flanking screen. The assignment of sound to screen remained  
495 fixed across the whole experiment. Participants / patients were instructed to turn their head to  
496 face the screen which the fixation cross appeared on and maintain fixation upon the cross  
497 (duration: 2.5 seconds). Afterwards, the fixation cross re-appeared on the center screen for 1.5  
498 ( $\pm 0.1$ ) seconds and participants had to bring their head back to the starting (i.e., central)  
499 position. The training session consisted of 160 trials, split across 4 blocks (i.e., 40 trials per  
500 block). The aim of the session was enabling participants / patients to form strong and stable  
501 associations between the sound cues and the corresponding head orientations (i.e., flanking  
502 screens).

503

504 *Memory task [EEG study].* Participants in the EEG study learned to associate 168 images of  
505 objects with specific head orientations. Each trial started with a fixation cross, presented for  
506  $1.5 \pm 0.1$  seconds. Afterwards, one of the four animal sounds from the training phase was  
507 played (duration 600ms). Subsequently, an image of an object was presented on the  
508 corresponding flanking screen for 4 seconds (the assignment of sound to screen was known  
509 to the participants from the training). Participants were instructed to turn their head to face the  
510 screen which the image appeared on and to remember the images and their position.  
511 Afterwards, the participants had to indicate via button press whether the previously seen  
512 object was animate or inanimate, with the question being presented on the center screen. The



513 pre-sleep memory test included the 168 images from encoding (old items) intermixed with 84  
514 new images, which were not seen by the participants before (“foils”). Each trial started with a  
515 fixation cross, presented for  $1.5 \pm 0.1$  s. After the fixation cross, an image was presented on  
516 the center screen. After 1 second, participants were asked to indicate whether the image was  
517 “old” (i.e., part of the learning material) or “new” (i.e., it was not seen during learning) within  
518 the next 10 s. In case of “new” responses, participants immediately moved on to the next trial.  
519 In case of “old” responses, participants were required to indicate by button press the related  
520 head orientation (i.e., the flanking screen on which the image was presented). Each trial ended  
521 with participants indicating how confident they were with their head orientation decision (scale  
522 from 0 corresponding to very uncertain to 4, very certain). The post-sleep retrieval followed  
523 the same procedures as the pre-sleep memory test with the exception that new foil images  
524 were used.

525  
526 *Memory task [intracranial EEG study].* The procedures of the memory task were similar to the  
527 EEG study, with some modifications. The stimulus pool was comprised of 288 objects (drawn  
528 from the same selection as used in the EEG study). In order not to overtax patients, the pre-  
529 sleep memory task was split into three consecutive encoding - retrieval blocks. During each  
530 encoding block patients were presented with 48 images on the flanking screens (please note  
531 that the trial level was identical to the one described above). Each encoding block was  
532 followed by a retrieval block, where the 48 images from encoding intermixed with 24 new  
533 images were presented. Hence, across all blocks, we used 144 images as old items and 72  
534 images as new items. As above, patients had to first indicate whether a given image was old  
535 or new and in case of old items specify the remembered head orientation. Due to time  
536 constraints no confidence rating was obtained. The post-sleep retrieval was executed in one  
537 run, meaning that patients were confronted with the 144 images which were part of the  
538 learning material and 72 foils.

539  
540 *Targeted memory reactivation.* For targeted memory reactivation 2 out of the 4 sounds  
541 presented during training and encoding were selected. Specifically, we randomly picked one  
542 out of the two sounds associated with the left-sided head orientations (i.e., flanking screens  
543 positioned at  $-60^\circ$  and  $-30^\circ$ ) and one sound associated with the right-sided head orientations  
544 (i.e., flanking screens positioned at  $30^\circ$  and  $60^\circ$ ). In addition, the fifth animal sound which was  
545 not used during training and encoding served as a control stimulus. The three cues were  
546 repeatedly presented during NREM sleep via loudspeaker with an intertrial interval of  $5.5 \pm$   
547  $0.2$  seconds ( $\sim 50$  dB sound pressure level) for a maximum of 60 minutes (EEG study:  $182.6 \pm$   
548  $31.41$  repetitions per stimulus; intracranial EEG study:  $187.1 \pm 23.7$  repetitions per stimulus).  
549 Sound presentation was stopped whenever signs of arousals, awakenings or REM sleep  
550 became visible.

551  
552 *Scalp EEG acquisition.* An EEGo 65 channel EEG system (ANT Neuro Enschede, Netherlands)  
553 was used to record electro-encephalography (EEG) throughout the experiment. Impedances

554 were kept below 20 k $\Omega$ . EEG signals were referenced online to electrode CPz and sampled at  
555 a rate of 1000 Hz. Furthermore, horizontal and vertical EOG was recorded for  
556 polysomnography. Sleep architecture was determined offline according to standard criteria by  
557 two independent raters<sup>81</sup>.

558

559 intracranial EEG acquisition. Intracranial EEG was recorded from Spencer depth electrodes  
560 (Ad-Tech Medical Instrument, Racine, Wisconsin, United States) with 4–12 contacts each, 5 mm  
561 apart. Data were recorded using XLTEK Neuroworks software (Natus Medical, San Carlos,  
562 California, US) and an XLTEK EMU128FS amplifier, with voltages referenced to a parietal  
563 electrode site. The sampling rate was set at 1000 Hz.

564

565 EEG data analysis. EEG data were preprocessed using the FieldTrip toolbox for EEG/MEG  
566 analysis<sup>82</sup>. All data were down-sampled to 200 Hz. Subsequently, the pre- and post-sleep  
567 retrieval as well as the TMR data were segmented into epochs. For the retrieval data, we  
568 segmented data from the onset of the associative retrieval. We reasoned that memory  
569 reactivation of associated head orientation-s should be particularly strong due to the potential  
570 hippocampal dependency (as compared to recognition tests<sup>83</sup>). The temporal range of the  
571 epochs was [–1 to 3 s] around stimulus onset for retrieval and TMR trials. Noisy EEG channels  
572 were identified by visual inspection, discarded, and interpolated, using a weighted average of  
573 the neighboring channels. The data were visually inspected and artefactual trials were  
574 removed. The retrieval data were additionally subjected to an independent component  
575 analysis (ICA) and ICA components associated with eye blinks and eye movements were  
576 identified and rejected.

577

578 intracranial EEG data analysis. The preprocessing steps for the intracranial EEG data were  
579 identical to the ones described above, just that intracranial EEG data were additionally  
580 inspected for epileptic activity, with data segments comprising epileptic events at any given  
581 contact being discarded ( $36.14 \pm 5.51$  % of all trials ( $N_{\text{allTrials}} = 633 \pm 26.48$ ); for interictal  
582 epileptiform discharge triggered classification see Supplementary Fig. 13). In addition,  
583 contacts which were contaminated with epileptiform background activity were discarded. Only  
584 seizure-free nights were included in the analysis.

585

586 Source level. To estimate the sources of the obtained effects in the scalp EEG study, we  
587 applied a DICS beamforming method<sup>84</sup>, as implemented in FieldTrip<sup>82</sup>. A spatial filter for each  
588 specified location (each grid point; 10mm<sup>3</sup> grid) was computed based on the cross -spectral  
589 density, calculated separately for all retrieval and TMR trials. Electrode locations for the 65-  
590 channel EEGo EEG system were co-registered to the surface of a standard MRI template in  
591 MNI (Montreal Neurological Institute) space using the nasion and the left and right  
592 preauricular as fiducial landmarks. A standard leadfield was computed using the standard  
593 boundary element model<sup>39</sup>. The forward model was created using a common dipole grid  
594 (10mm<sup>3</sup> grid) of the grey matter volume (derived from the anatomical automatic labeling atlas

595 <sup>85</sup> in MNI space, warped onto standard MRI template, leading to 1457 virtual sensors. Data  
596 analysis was accomplished in the same way as on sensor level.

597

598 Time–frequency analysis. Time–frequency analysis of the TMR segments (memory related and  
599 control cues) was performed using FieldTrip. Frequency decomposition of the data, using  
600 Fourier analysis based on sliding time windows (moving forward in 50 ms increments). The  
601 window length was set to five cycles of a given frequency (frequency range: 1–25 Hz in 1 Hz  
602 steps). The windowed data segments were multiplied with a Hanning taper before Fourier  
603 analysis. Afterwards, power values were z-scored across time [–1 to 3 s]. The longer time  
604 segments were chosen to allow for resolving low frequency activity within the time windows of  
605 interest [–0.5 to 1.5 s] and avoid edge artifacts. For intracranial EEG data frontal, parietal and  
606 temporal contacts were taken into account.

607

608 Multivariate analysis. Multivariate classification of single-trial EEG data was performed using  
609 MVPA-Light, a MATLAB-based toolbox for multivariate pattern analysis <sup>86</sup>. For all multivariate  
610 analyses, a LDA was used as a classifier. Prior to classification, data in both studies were re-  
611 referenced using a common average reference (CAR).

612 For classification within the retrieval task, the localizer data were z-scored across all trials for  
613 each time point separately. Next, data from the pre- and the post-sleep retrieval were  
614 collapsed and subjected to a principal component analysis (PCA), which transforms the data  
615 into linearly uncorrelated components, ordered by the amount of variance explained by each  
616 component <sup>87</sup>. PCA was applied to reduce dimensionality and limit over-fitting (PCA) and the  
617 first 30 principal components were retained for further analysis. To quantify whether  
618 remembered head orientations can be differentiated during retrieval, the classifier was trained  
619 and tested to discriminate between the later cued head orientations (i.e., one left sided and  
620 one right sided head orientation; see Targeted Memory reactivation for details). Only trials  
621 belonging to remembered head orientations entered the analysis. Data were smoothed using  
622 a running average window of 150 ms. The EEG channels / intracranial EEG contacts served as  
623 features and a different classifier was trained and tested on every time point. As metric, we  
624 used Area Under the ROC Curve (AUC), which indexes the mean accuracy with which a  
625 randomly chosen pair of Class A and Class B trials could be assigned to their correct classes  
626 (0.5 = random performance; 1.0 = perfect performance). To avoid overfitting, data were split  
627 into training and test sets using fivefold cross- validation <sup>88</sup>. Since cross-validation results are  
628 stochastic due to the random assignment of trials into folds, the analysis was repeated five  
629 times and results were averaged. For statistical evaluation, the classification output was tested  
630 against chance levels (i.e., 0.5). To resolve the topography of diagnostic features in the scalp  
631 EEG data, we conducted a “searchlight decoding procedure” (Fig. 2c). In brief, PCA  
632 components were projected back to sensor space and the classification procedure was  
633 repeated across moving kernels of small electrode clusters, with neighboring electrodes being  
634 selected as features [feature number range: 5 to 9]. Finally, classification values were collapsed

635 across our time windows of interest [retrieval time: -30 to 680 ms;] and tested against chance  
636 level (corrected for multiple comparisons across space).

637 To investigate whether TMR would elicit head orientation-related activity, we used the  
638 temporal generalization method<sup>89</sup>. Prior to decoding, a baseline correction was applied based  
639 on the whole trial for retrieval and TMR segments [-0.5 to 3 s]. Next, retrieval and TMR data  
640 were z-scored across trials and collapsed. PCA was applied to the pooled retrieval-TMR data  
641 and the first 30 principal components were retained. Retrieval and TMR data were smoothed  
642 using a running average window of 150 ms. A classifier was then trained for every time point  
643 in the retrieval data and applied on every time point during TMR. No cross-validation was  
644 required since retrieval and TMR datasets were independent. As metric, we again used AUC  
645 (see above). For statistical evaluation, the classification output was tested against chance levels  
646 (i.e., 0.5).

647 Given that the interaction between SO-spindles and ripples has been tightly linked to memory  
648 reactivation<sup>33,34</sup>, we determined whether TMR-triggered reactivation of head orientation  
649 activity would be traceable in intracranial EEG recordings, specifically in trials where the  
650 probability for SO-spindles and concomitant ripples would be high: for each participant, we  
651 sorted the TMR trials as a function of power in the clusters obtained in the time-frequency  
652 analysis (Fig. 3c) and divided the trials using a median split. Then, a classifier was trained on  
653 the concatenated retrieval data from both pre- and post-sleep sessions [-0.5 to 1s] and the  
654 resulting training weights were applied on the TMR data [-0.5 to 1.5 s], either comprising high  
655 SO-spindle power trials (i.e., where ripples peaked during spindle activity) or low SO-spindle  
656 power trials and contrasted the resultant performance outcomes. For statistical evaluation,  
657 classification performance of both categories was directly compared.

658 For ripple triggered classification, a classifier was trained on the concatenated retrieval data  
659 from both pre- and post-sleep sessions [-0.5 to 1s], but the resulting training weights were  
660 applied on intracranial EEG segments centered around spindle-locked MTL ripples (i.e.,  
661 ripples occurring during spindles between 700 to 1400 ms after cue onset). For statistical  
662 evaluation, surrogate decoding performance was calculated by centering intracranial EEG  
663 segments around time-points where no ripple was present during the time-window of  
664 preferred spindle-ripple interactions (i.e., 700-1400 ms after cue onset). This procedure was  
665 repeated 100 times and resulting surrogate performance values were then averaged,  
666 providing baseline values for each participant under the null hypothesis that spindle locked  
667 ripples would not be relevant for the classification of stimulus categories.

668 For the scalp EEG data, head orientations were decoded in source space using searchlight  
669 analysis<sup>90</sup>. A sphere of radius 2 cm was centered on each of the 1467 voxels in the brain. All  
670 voxels within the sphere that were inside the brain volume (10-26 voxels) were selected as  
671 features. Identical to the sensor level analysis a classifier was trained for every time point in the  
672 retrieval data and applied on every time point during TMR. Finally, classification values were  
673 collapsed across our time windows of interest [retrieval time: -110 to 330 ms;] and tested  
674 against chance level (corrected for multiple comparisons across space).

675

676 Ripple detection. Ripple events in the medial temporal lobe (MTL) depth recordings (7  
677 patients, 14 contacts in total: 4 hippocampal, 7 parahippocampal and 3 entorhinal contacts)  
678 were detected during artifact-free TMR segments using offline algorithms<sup>18,91</sup>. The intracranial  
679 EEG signal (sampling rate 1000 Hz) was band-pass filtered from 80 to 120 Hz and the root mean  
680 square signal (RMS) was calculated based on a 20 ms windows followed by an additional  
681 smoothing with the same window length. A ripple event was identified whenever the  
682 smoothed RMS-signal exceed a threshold, defined by the mean plus 2 times the standard  
683 deviation of the RMS-signal across all TMR data points. Potential ripple events shorter than 25  
684 ms or longer than 300 ms were rejected. All ripple events were required to exhibit a minimum  
685 of three cycles in the raw signal.

686  
687 Peri-event histograms of ripple occurrence. To investigate the timing of MTL ripples (centered  
688 at the maximal negative amplitude) with regards to TMR cues, we first sorted for each  
689 participant the TMR trials as a function of power in the clusters obtained in the time-frequency  
690 analysis (Fig. 3c) and divided the trials using a median split. We then created for each condition  
691 peri-event histograms (bin size = 50 ms) of ripple events time-locked to TMR cues. The  
692 resulting histograms were normalized by the total number of TMR trials (multiplied by 100).

693  
694 Modulation Index: Phase amplitude coupling was assessed with the Modulation Index (MI)<sup>35</sup>.  
695 We first isolated in each patient the cortical contact exhibiting the strongest power in the  
696 spindle band (12-15 Hz; 0 – 1.5 seconds after cues onset; see Supplementary Table 3 for an  
697 overview). All intracranial EEG data segments were centered in relation to MTL detected ripple  
698 maxima, focusing on ripples which paralleled cortical spindles (i.e., ripples emerging in a time-  
699 window from 700 to 1400 ms after cue onset). Low frequencies in cortical contacts (4 – 20 Hz)  
700 were filtered with a window of 0.3 times the frequency of interest, centered on each frequency  
701 step. High frequencies in MTL contacts (20 – 130 Hz) were filtered with a window of 0.7 times  
702 the frequency of interest. To compute the MI (for a given frequency pair), we divided the phase  
703 signal into 18 bins (20° each), and then, computed for each bin the mean amplitude. This  
704 yielded a distribution of amplitude as a function of phase. The MI is defined as the Kullback-  
705 Leibler distance between that distribution and the uniform distribution (over the same number  
706 of bins). To assess the statistical significance of the MI values, we randomly shuffled the trials  
707 of the amplitude providing contacts and computed the MI using the shuffled data. We  
708 repeated this procedure 100 times, resulting in a MI-level reference distribution.

709  
710 Spindle-ripple coupling: For the analysis of the coupling between cortical spindles and MTL  
711 ripples, we first isolated in each patient the cortical contact exhibiting the strongest power in  
712 the spindle band (12-15 Hz; 0 – 1.5 seconds after cues onset). We then filtered the data (12-15  
713 Hz, two-pass Butterworth bandpass filter) and applied a Hilbert transform. The instantaneous  
714 phase angle of cortical recordings at the time of MTL detected ripple maxima was extracted.  
715 We specifically focused on ripples which occurred during cortical spindles (i.e., ripples  
716 emerging in a time-window from 700 to 1400 ms after cue onset). The preferred phase of

717 spindle-ripple coupling for each cortical contact was then obtained by taking the circular mean  
718 of all individual events' preferred phases.

719

720 Statistics. Behavioral retrieval data were subjected to a 2 (TMR: cued/uncued) × 2 (Test-Time:  
721 Pre-sleep/Post-sleep) repeated measures ANOVA. The statistical significance thresholds for  
722 all behavioral analyses were set at  $p < .05$ . FieldTrip's cluster permutation test<sup>82</sup> was used to  
723 deal with the multiple comparisons problem for all classification analyses. A dependent-  
724 samples t-test was used at the sample level to identify clusters of contiguous time points across  
725 participants and values were thresholded at  $p = 0.05$ . Monte Carlo simulations were used to  
726 calculate the cluster  $p$  value ( $\alpha = 0.05$ , two-tailed) under the permutation distribution.  
727 Analyses were performed at the group level. The input data were either classification values  
728 across time (Fig. 1c + 3b) or time × time classification values (Fig. 2b + 3c). In all cases a two-  
729 sided cluster permutation test with 1000 randomizations was used to contrast classification  
730 accuracy against chance performance. The same statistical rationale was implemented for the  
731 statistical assessment of time frequency data with time × frequency values as input, as well as  
732 for phase-amplitude data (frequency × frequency as input) and peri-event histograms (time as  
733 input). Statistical analysis of TFR data in the intracranial EEG study was performed at the  
734 individual electrode/contact level (fixed-effects analysis), considering all intracranial EEG  
735 contacts ( $N = 389$ ; see Supplementary Fig. 9 for coverage), while statistical analysis of phase-  
736 amplitude and peri-event histogram data considered all possible cortical-MTL contact pairs ( $N$   
737 = 14, fixed effects; with chosen cortical contacts showing the strongest spindle power).  
738 Pearson correlation was used to assess the relationship between (i) classification performance  
739 and time-frequency power (Fig. 2d) and (ii) the time-course of classification performance and  
740 ripple density (Fig. 3d). For circular statistics (Fig. 4a), the phase distributions across all cortical-  
741 MTL contact pairs ( $N = 14$ ) were tested against uniformity with a specified mean direction (i.e.,  
742  $\pm\pi$  corresponding to the spindle through) using the V-test (CircStat toolbox<sup>92</sup>).

743

## 744 References

745

- 746 1. Klinzing, J. G., Niethard, N. & Born, J. Mechanisms of systems memory consolidation  
747 during sleep. *Nat Neurosci* **22**, 1598–1610 (2019).
- 748 2. Frankland, P. W. & Bontempi, B. The organization of recent and remote memories.  
749 *Nat Rev Neurosci* **6**, 119–130 (2005).
- 750 3. Dudai, Y., Karni, A. & Born, J. The Consolidation and Transformation of Memory.  
751 *Neuron* **88**, 20–32 (2015).
- 752 4. Navarrete, M., Valderrama, M. & Lewis, P. A. The role of slow-wave sleep rhythms in  
753 the cortical-hippocampal loop for memory consolidation. *Current Opinion in Behavioral*  
754 *Sciences* **32**, 102–110 (2020).
- 755 5. Schreiner, T. & Staudigl, T. Electrophysiological signatures of memory reactivation in  
756 humans. *Philos Trans R Soc Lond B Biol Sci* **375**, 20190293 (2020).
- 757 6. Girardeau, G. & Lopes-Dos-Santos, V. Brain neural patterns and the memory function  
758 of sleep. *Science* **374**, 560–564 (2021).
- 759 7. Timofeev, I. Neuronal plasticity and thalamocortical sleep and waking oscillations.  
760 *Prog Brain Res* **193**, 121–144 (2011).

- 761 8. Fernandez, L. M. J. & Lüthi, A. Sleep Spindles: Mechanisms and Functions. *Physiol*  
762 *Rev* **100**, 805–868 (2020).
- 763 9. Isomura, Y. *et al.* Integration and segregation of activity in entorhinal-hippocampal  
764 subregions by neocortical slow oscillations. *Neuron* **52**, 871–882 (2006).
- 765 10. Schreiner, T., Kaufmann, E., Noachtar, S., Mehrkens, J.-H. & Staudigl, T. The human  
766 thalamus orchestrates neocortical oscillations during NREM sleep. *Nat Commun* **13**, 5231  
767 (2022).
- 768 11. Mak-McCully, R. A. *et al.* Coordination of cortical and thalamic activity during non-  
769 REM sleep in humans. *Nat Commun* **8**, 15499 (2017).
- 770 12. Rosanova, M. & Ulrich, D. Pattern-specific associative long-term potentiation induced  
771 by a sleep spindle-related spike train. *J Neurosci* **25**, 9398–9405 (2005).
- 772 13. Seibt, J. *et al.* Cortical dendritic activity correlates with spindle-rich oscillations during  
773 sleep in rodents. *Nat Commun* **8**, 684 (2017).
- 774 14. Niethard, N., Ngo, H.-V. V., Ehrlich, I. & Born, J. Cortical circuit activity underlying  
775 sleep slow oscillations and spindles. *Proc Natl Acad Sci U S A* **115**, E9220–E9229 (2018).
- 776 15. Buzsáki, G. Hippocampal sharp wave-ripple: A cognitive biomarker for episodic  
777 memory and planning. *Hippocampus* **25**, 1073–1188 (2015).
- 778 16. O’Neill, J., Pleydell-Bouverie, B., Dupret, D. & Csicsvari, J. Play it again: reactivation  
779 of waking experience and memory. *Trends in Neurosciences* **33**, 220–229 (2010).
- 780 17. Helfrich, R. F. *et al.* Bidirectional prefrontal-hippocampal dynamics organize  
781 information transfer during sleep in humans. *Nat Commun* **10**, 3572 (2019).
- 782 18. Ngo, H.-V., Fell, J. & Staresina, B. Sleep spindles mediate hippocampal-neocortical  
783 coupling during long-duration ripples. *eLife* **9**, e57011 (2020).
- 784 19. Siapas, A. G. & Wilson, M. A. Coordinated Interactions between Hippocampal  
785 Ripples and Cortical Spindles during Slow-Wave Sleep. *Neuron* **21**, 1123–1128 (1998).
- 786 20. Brodt, S., Inostroza, M., Niethard, N. & Born, J. Sleep—A brain-state serving systems  
787 memory consolidation. *Neuron* **111**, 1050–1075 (2023).
- 788 21. Staresina, B. P. *et al.* Hierarchical nesting of slow oscillations, spindles and ripples in  
789 the human hippocampus during sleep. *Nat Neurosci* **18**, 1679–1686 (2015).
- 790 22. Staresina, B. P., Niediek, J., Borger, V., Surges, R. & Mormann, F. How coupled slow  
791 oscillations, spindles and ripples coordinate neuronal processing and communication during  
792 human sleep. *Nat Neurosci* 1–9 (2023) doi:10.1038/s41593-023-01381-w.
- 793 23. van Schalkwijk, F. J. *et al.* An evolutionary conserved division-of-labor between  
794 archicortical and neocortical ripples organizes information transfer during sleep. *Progress in*  
795 *Neurobiology* 102485 (2023) doi:10.1016/j.pneurobio.2023.102485.
- 796 24. Jiang, X., Gonzalez-Martinez, J. & Halgren, E. Coordination of Human Hippocampal  
797 Sharpwave Ripples during NREM Sleep with Cortical Theta Bursts, Spindles, Downstates,  
798 and Upstates. *J. Neurosci.* **39**, 8744–8761 (2019).
- 799 25. Jiang, X., Gonzalez-Martinez, J. & Halgren, E. Posterior Hippocampal Spindle  
800 Ripples Co-occur with Neocortical Theta Bursts and Downstates-Upstates, and Phase-Lock  
801 with Parietal Spindles during NREM Sleep in Humans. *J Neurosci* **39**, 8949–8968 (2019).
- 802 26. Geva-Sagiv, M. *et al.* Augmenting hippocampal–prefrontal neuronal synchrony during  
803 sleep enhances memory consolidation in humans. *Nat Neurosci* **26**, 1100–1110 (2023).
- 804 27. Oudiette, D. & Paller, K. A. Upgrading the sleeping brain with targeted memory  
805 reactivation. *Trends Cogn Sci* **17**, 142–149 (2013).
- 806 28. Hu, X., Cheng, L. Y., Chiu, M. H. & Paller, K. A. Promoting memory consolidation  
807 during sleep: A meta-analysis of targeted memory reactivation. *Psychol Bull* **146**, 218–244  
808 (2020).
- 809 29. Göldi, M., van Poppel, E. A. M., Rasch, B. & Schreiner, T. Increased neuronal  
810 signatures of targeted memory reactivation during slow-wave up states. *Sci Rep* **9**, 2715  
811 (2019).

- 812 30. Oyarzún, J. P., Morís, J., Luque, D., Diego-Balaguer, R. de & Fuentemilla, L.  
813 Targeted Memory Reactivation during Sleep Adaptively Promotes the Strengthening or  
814 Weakening of Overlapping Memories. *J. Neurosci.* **37**, 7748–7758 (2017).
- 815 31. Schechtman, E. *et al.* Multiple memories can be simultaneously reactivated during  
816 sleep as effectively as a single memory. *Commun Biol* **4**, 1–13 (2021).
- 817 32. Clemens, Z. *et al.* Temporal coupling of parahippocampal ripples, sleep spindles and  
818 slow oscillations in humans. *Brain* **130**, 2868–2878 (2007).
- 819 33. Maingret, N., Girardeau, G., Todorova, R., Goutierre, M. & Zugaro, M. Hippocampo-  
820 cortical coupling mediates memory consolidation during sleep. *Nat Neurosci* **19**, 959–964  
821 (2016).
- 822 34. Latchoumane, C.-F. V., Ngo, H.-V. V., Born, J. & Shin, H.-S. Thalamic Spindles  
823 Promote Memory Formation during Sleep through Triple Phase-Locking of Cortical,  
824 Thalamic, and Hippocampal Rhythms. *Neuron* **95**, 424–435.e6 (2017).
- 825 35. Tort, A. B. L., Komorowski, R., Eichenbaum, H. & Kopell, N. Measuring phase-  
826 amplitude coupling between neuronal oscillations of different frequencies. *J Neurophysiol*  
827 **104**, 1195–1210 (2010).
- 828 36. Cox, R., Rüber, T., Staresina, B. P. & Fell, J. Heterogeneous profiles of coupled sleep  
829 oscillations in human hippocampus. *Neuroimage* **202**, 116178 (2019).
- 830 37. Rasch, B. & Born, J. About Sleep’s Role in Memory. *Physiological Reviews* **93**, 681–  
831 766 (2013).
- 832 38. Chen, Z. S. & Wilson, M. A. Now and Then: How Our Understanding of Memory  
833 Replay Evolves. *Journal of Neurophysiology* (2023) doi:10.1152/jn.00454.2022.
- 834 39. Oostenveld, R., Stegeman, D. F., Praamstra, P. & van Oosterom, A. Brain symmetry  
835 and topographic analysis of lateralized event-related potentials. *Clinical Neurophysiology*  
836 **114**, 1194–1202 (2003).
- 837 40. Helfrich, R. F., Lendner, J. D. & Knight, R. T. Aperiodic sleep networks promote  
838 memory consolidation. *Trends in Cognitive Sciences* **25**, 648–659 (2021).
- 839 41. Schreiner, T., Petzka, M., Staudigl, T. & Staresina, B. P. Endogenous memory  
840 reactivation during sleep in humans is clocked by slow oscillation-spindle complexes. *Nat*  
841 *Commun* **12**, 3112 (2021).
- 842 42. Schechtman, E., Heilberg, J. & Paller, K. A. Memory consolidation during sleep  
843 involves context reinstatement in humans. *Cell Reports* **42**, (2023).
- 844 43. Nunez, P. L. & Srinivasan, R. *Electric Fields of the Brain: The Neurophysics of Eeg.*  
845 (Oxford University Press, 2005).
- 846 44. Staudigl, T., Vollmar, C., Noachtar, S. & Hanslmayr, S. Temporal-pattern similarity  
847 analysis reveals the beneficial and detrimental effects of context reinstatement on human  
848 memory. *J Neurosci* **35**, 5373–5384 (2015).
- 849 45. Miller, J. F. *et al.* Neural activity in human hippocampal formation reveals the spatial  
850 context of retrieved memories. *Science* **342**, 1111–1114 (2013).
- 851 46. Schechtman, E., Heilberg, J. & Paller, K. A. Made together, replayed together:  
852 Context reinstatement during sleep guides memory consolidation. 2022.03.28.486140 Preprint  
853 at <https://doi.org/10.1101/2022.03.28.486140> (2022).
- 854 47. Stangl, M., Maoz, S. L. & Suthana, N. Mobile cognition: imaging the human brain in  
855 the ‘real world’. *Nat Rev Neurosci* **24**, 347–362 (2023).
- 856 48. Taube, J. S., Valerio, S. & Yoder, R. M. Is navigation in virtual reality with fMRI  
857 really navigation? *J Cogn Neurosci* **25**, 1008–1019 (2013).
- 858 49. Stangl, M. *et al.* Boundary-anchored neural mechanisms of location-encoding for self  
859 and others. *Nature* **589**, 420–425 (2021).
- 860 50. Griffiths, B. J. *et al.* Electrophysiological signatures of veridical head direction in  
861 humans. 2023.01.26.525724 Preprint at <https://doi.org/10.1101/2023.01.26.525724> (2023).
- 862 51. Taube, J., Muller, R. & Ranck, J. Head-direction cells recorded from the



- 863 postsubiculum in freely moving rats. I. Description and quantitative analysis. *J. Neurosci.* **10**,  
864 420–435 (1990).
- 865 52. Cullen, K. E. & Taube, J. S. Our sense of direction: progress, controversies and  
866 challenges. *Nat Neurosci* **20**, 1465–1473 (2017).
- 867 53. Hulse, B. K. & Jayaraman, V. Mechanisms Underlying the Neural Computation of  
868 Head Direction. *Annu Rev Neurosci* **43**, 31–54 (2020).
- 869 54. Geva-Sagiv, M., Las, L., Yovel, Y. & Ulanovsky, N. Spatial cognition in bats and rats:  
870 from sensory acquisition to multiscale maps and navigation. *Nat Rev Neurosci* **16**, 94–108  
871 (2015).
- 872 55. Peyrache, A., Lacroix, M. M., Petersen, P. C. & Buzsáki, G. Internally organized  
873 mechanisms of the head direction sense. *Nat Neurosci* **18**, 569–575 (2015).
- 874 56. Chaudhuri, R., Gerçek, B., Pandey, B., Peyrache, A. & Fiete, I. The intrinsic attractor  
875 manifold and population dynamics of a canonical cognitive circuit across waking and sleep.  
876 *Nat Neurosci* **22**, 1512–1520 (2019).
- 877 57. Viejo, G. & Peyrache, A. Precise coupling of the thalamic head-direction system to  
878 hippocampal ripples. *Nat Commun* **11**, 2524 (2020).
- 879 58. Ajabi, Z., Keinath, A. T., Wei, X.-X. & Brandon, M. P. Population dynamics of head-  
880 direction neurons during drift and reorientation. *Nature* **615**, 892–899 (2023).
- 881 59. Zirkelbach, J., Stemmler, M. & Herz, A. V. M. Anticipatory Neural Activity Improves  
882 the Decoding Accuracy for Dynamic Head-Direction Signals. *J Neurosci* **39**, 2847–2859  
883 (2019).
- 884 60. Kunz, L. *et al.* Mesoscopic Neural Representations in Spatial Navigation. *Trends in*  
885 *Cognitive Sciences* **23**, 615–630 (2019).
- 886 61. Buzsáki, G. & Moser, E. I. Memory, navigation and theta rhythm in the hippocampal-  
887 entorhinal system. *Nat Neurosci* **16**, 130–138 (2013).
- 888 62. Schreiner, T. & Rasch, B. Boosting Vocabulary Learning by Verbal Cueing During  
889 Sleep. *Cereb Cortex* **25**, 4169–4179 (2015).
- 890 63. Schreiner, T., Lehmann, M. & Rasch, B. Auditory feedback blocks memory benefits  
891 of cueing during sleep. *Nat Commun* **6**, 8729 (2015).
- 892 64. Antony, J. W., Gobel, E. W., O’Hare, J. K., Reber, P. J. & Paller, K. A. Cued memory  
893 reactivation during sleep influences skill learning. *Nat Neurosci* **15**, 1114–1116 (2012).
- 894 65. Schönauer, M., Geisler, T. & Gais, S. Strengthening procedural memories by  
895 reactivation in sleep. *J Cogn Neurosci* **26**, 143–153 (2014).
- 896 66. Lewis, P. A. & Bendor, D. How Targeted Memory Reactivation Promotes  
897 the Selective Strengthening of Memories in Sleep. *Curr Biol* **29**, R906–R912 (2019).
- 898 67. Joensen, B. H. *et al.* Targeted memory reactivation during sleep can induce forgetting  
899 of overlapping memories. *Learn Mem* **29**, 401–411 (2022).
- 900 68. Antony, J. W., Cheng, L. Y., Brooks, P. P., Paller, K. A. & Norman, K. A.  
901 Competitive learning modulates memory consolidation during sleep. *Neurobiology of*  
902 *Learning and Memory* **155**, 216–230 (2018).
- 903 69. Mensink, G.-J. & Raaijmakers, J. G. A model for interference and forgetting.  
904 *Psychological Review* **95**, 434–455 (1988).
- 905 70. Anderson, M. C., Bjork, R. A. & Bjork, E. L. Remembering can cause forgetting:  
906 retrieval dynamics in long-term memory. *J Exp Psychol Learn Mem Cogn* **20**, 1063–1087  
907 (1994).
- 908 71. Yonelinas, A. P. Receiver-operating characteristics in recognition memory: evidence  
909 for a dual-process model. *J Exp Psychol Learn Mem Cogn* **20**, 1341–1354 (1994).
- 910 72. Squire, L. R., Zola-Morgan, J. & Clark, R. E. Recognition memory and the medial  
911 temporal lobe: a new perspective. *Nat Rev Neurosci* **8**, 872–883 (2007).
- 912 73. DeSoto, K. A. & Roediger, H. L. Positive and Negative Correlations Between  
913 Confidence and Accuracy for the Same Events in Recognition of Categorized Lists. *Psychol*

- 914 *Sci* **25**, 781–788 (2014).
- 915 74. Cairney, S. A., Guttesen, A. Á. V., El Marj, N. & Staresina, B. P. Memory  
916 Consolidation Is Linked to Spindle-Mediated Information Processing during Sleep. *Curr Biol*  
917 **28**, 948-954.e4 (2018).
- 918 75. Ngo, H.-V. V. & Staresina, B. P. Shaping overnight consolidation via slow-oscillation  
919 closed-loop targeted memory reactivation. *Proc Natl Acad Sci U S A* **119**, e2123428119  
920 (2022).
- 921 76. Helfrich, R. F., Mander, B. A., Jagust, W. J., Knight, R. T. & Walker, M. P. Old  
922 Brains Come Uncoupled in Sleep: Slow Wave-Spindle Synchrony, Brain Atrophy, and  
923 Forgetting. *Neuron* **97**, 221-230.e4 (2018).
- 924 77. Buysse, D. J., Reynolds, C. F., Monk, T. H., Berman, S. R. & Kupfer, D. J. The  
925 Pittsburgh sleep quality index: A new instrument for psychiatric practice and research.  
926 *Psychiatry Research* **28**, 193–213 (1989).
- 927 78. Horne, J. A. & Ostberg, O. A self-assessment questionnaire to determine morningness-  
928 eveningness in human circadian rhythms. *Int J Chronobiol* **4**, 97–110 (1976).
- 929 79. Konkle, T., Brady, T. F., Alvarez, G. A. & Oliva, A. Conceptual distinctiveness  
930 supports detailed visual long-term memory for real-world objects. *J Exp Psychol Gen* **139**,  
931 558–578 (2010).
- 932 80. Brainard, D. H. The Psychophysics Toolbox. *Spat Vis* **10**, 433–436 (1997).
- 933 81. Iber, C., Ancoli-Israel, S., Chesson, A. L. & Quan, S. F. *The AASM Manual for the*  
934 *Scoring of Sleep and Associated Events: Rules, Terminology, and Technical Specification*.  
935 (American Academy of Sleep Medicine, 2007). doi:10.1007/978-3-7985-1852-0.
- 936 82. Oostenveld, R., Fries, P., Maris, E. & Schoffelen, J.-M. FieldTrip: Open source  
937 software for advanced analysis of MEG, EEG, and invasive electrophysiological data.  
938 *Comput Intell Neurosci* **2011**, 156869 (2011).
- 939 83. Davachi, L. Item, context and relational episodic encoding in humans. *Curr Opin*  
940 *Neurobiol* **16**, 693–700 (2006).
- 941 84. Gross, J. *et al.* Dynamic imaging of coherent sources: Studying neural interactions in  
942 the human brain. *Proc. Natl. Acad. Sci. U.S.A.* **98**, 694–699 (2001).
- 943 85. Tzourio-Mazoyer, N. *et al.* Automated anatomical labeling of activations in SPM  
944 using a macroscopic anatomical parcellation of the MNI MRI single-subject brain.  
945 *Neuroimage* **15**, 273–289 (2002).
- 946 86. Treder, M. S. MVPA-Light: A Classification and Regression Toolbox for Multi-  
947 Dimensional Data. *Frontiers in Neuroscience* **14**, (2020).
- 948 87. Jackson, J. E. *A user's guide to principal components*. (Wiley-Interscience, 2003).
- 949 88. Lemm, S., Blankertz, B., Dickhaus, T. & Müller, K.-R. Introduction to machine  
950 learning for brain imaging. *Neuroimage* **56**, 387–399 (2011).
- 951 89. King, J.-R. & Dehaene, S. Characterizing the dynamics of mental representations: the  
952 temporal generalization method. *Trends Cogn Sci* **18**, 203–210 (2014).
- 953 90. Kriegeskorte, N. Pattern-information analysis: from stimulus decoding to  
954 computational-model testing. *Neuroimage* **56**, 411–421 (2011).
- 955 91. Zhang, H., Fell, J. & Axmacher, N. Electrophysiological mechanisms of human  
956 memory consolidation. *Nat Commun* **9**, 4103 (2018).
- 957 92. Berens, P. CircStat: A MATLAB Toolbox for Circular Statistics. *Journal of Statistical*  
958 *Software* **31**, 1–21 (2009).
- 959  
960  
961  
962  
963  
964

965 Acknowledgements

966 This work was supported by the European Research Council (<https://erc.europa.eu/>, Starting  
967 Grant 802681 awarded to T.St). T.S is supported by the Emmy Noether program of the German  
968 Research Foundation (492835154). We are indebted to all patients and participants who  
969 volunteered to participate in this study. We thank the staff and physicians at the Epilepsy  
970 Center, Department of Neurology, Ludwig Maximilians University, Munich for assistance.

971

972

973 Competing interests

974 The authors declare no competing interests.

975 Supplementary Information

976

977

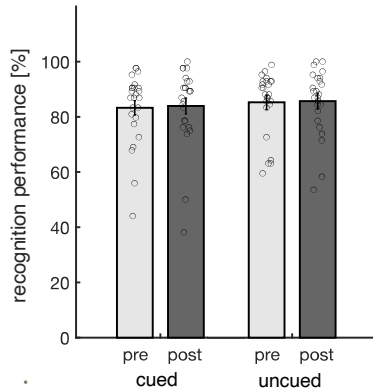

978  
979  
980  
981  
982  
983  
984  
985  
986  
987

Supplementary Figure 1. Recognition memory performance (EEG study). Behavioral results for both experimental sessions pre- (light gray) and post-sleep (dark gray), separated into cued and uncued trials. Bar graphs show mean ( $\pm$ SEM) percentage of correctly recognized images ('hits'). Dots indicate individual memory performance of participants ( $N = 25$ ). There was neither a significant main effect of test time ( $F_{1,24} = 0.29$ ;  $p = 0.59$ ), nor a significant interaction between test-time and cueing ( $F_{1,24} = 0.08$ ;  $p = 0.77$ ).

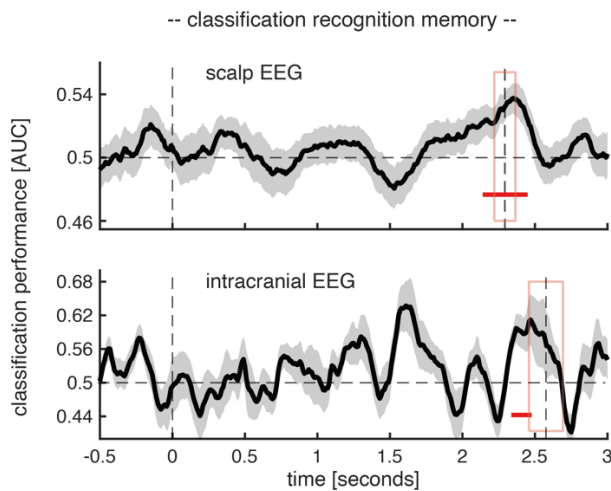

988  
989  
990  
991  
992  
993  
994  
995  
996  
997  
998  
999  
1000  
1001

Supplementary Figure 2. Classification of later cued head orientations (left vs. right) locked to recognition onset (time = 0; first dashed vertical line). Later cued head orientations could be decoded (above chance) towards the end of recognition test trials, briefly preceding the onset of the of the associate prompt. The second vertical dashed line indicates the mean onset of the associative memory prompt. The red rectangle illustrates the standard error of the mean. The black solid line indicates decoding performance ( $\pm$ SEM). The horizontal dashed line indicates chance level performance (i.e., 0.5). The lower horizontal red line shows the temporal extent of significant decoding results as derived from a dependent-samples t-test (one-sided, scalp EEG study:  $p < 0.032$ ; intracranial EEG study:  $p = 0.043$ , cluster corrected across time).

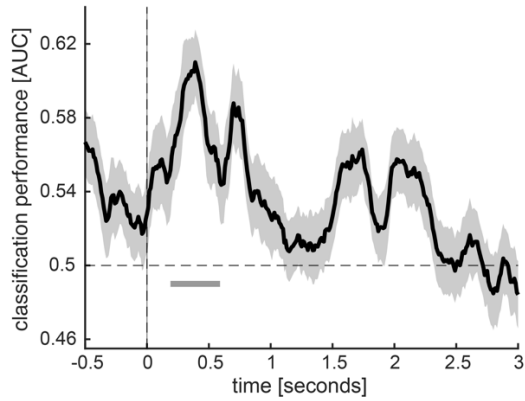

1002  
1003  
1004  
1005  
1006  
1007  
1008  
1009  
1010  
1011

Supplementary Figure 3. Classification of later not cued head orientations during retrieval. Later not cued head orientations (left vs. right) could be reliably decoded (above chance) from the retrieval data between 190 and 590 ms after the onset of the associate prompt (the black solid line indicates decoding performance ( $\pm$ SEM)). The horizontal dashed line indicates chance level performance (i.e., 0.5). The vertical solid line indicates the onset of associative retrieval trials (time = 0). The lower horizontal gray line shows the temporal extent of significant decoding results as derived from a dependent-samples t-test (two-sided,  $p < 0.006$ , cluster corrected across time).

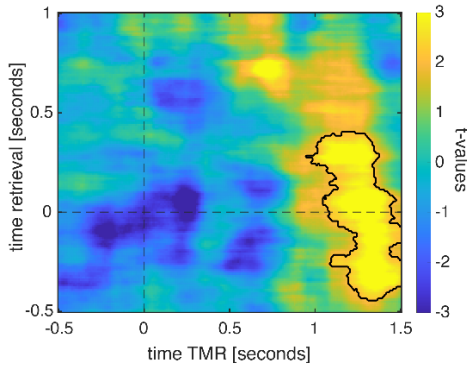

1012  
1013  
1014  
1015  
1016  
1017

Supplementary Figure 4. Classification using TMR trials exhibiting increased levels of activity in the SO-spindle range. Retrieval-related brain patterns (left vs. right head orientations) were reliably decodable during 'high power' TMR trials (contour lines indicate the extent of the significant cluster,  $p = 0.005$  corrected; color range (blue to yellow) represents t values against chance level performance (i.e., 0.5)).

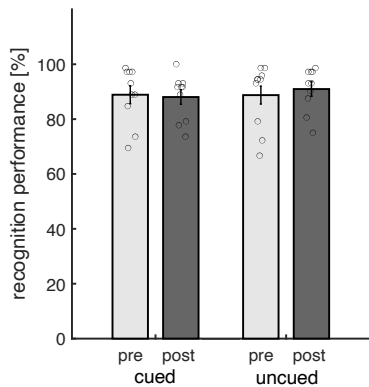

1018  
1019  
1020  
1021  
1022  
1023  
1024  
1025

Supplementary Figure 5. Recognition memory performance (intracranial EEG study). Behavioral results for both experimental sessions pre- (light gray) and post-sleep (dark gray), separated into cued and uncued trials. Bar graphs show mean ( $\pm$ SEM) percentage of correctly recognized images ('hits'). Dots indicate individual memory performance of participants (N = 10). There was neither a significant main effect of test time ( $F_{1,9} = 0.06$ ;  $p = 0.08$ ); nor a significant interaction between test-time and cueing ( $F_{1,9} = 2.25$ ;  $p = 0.16$ ).

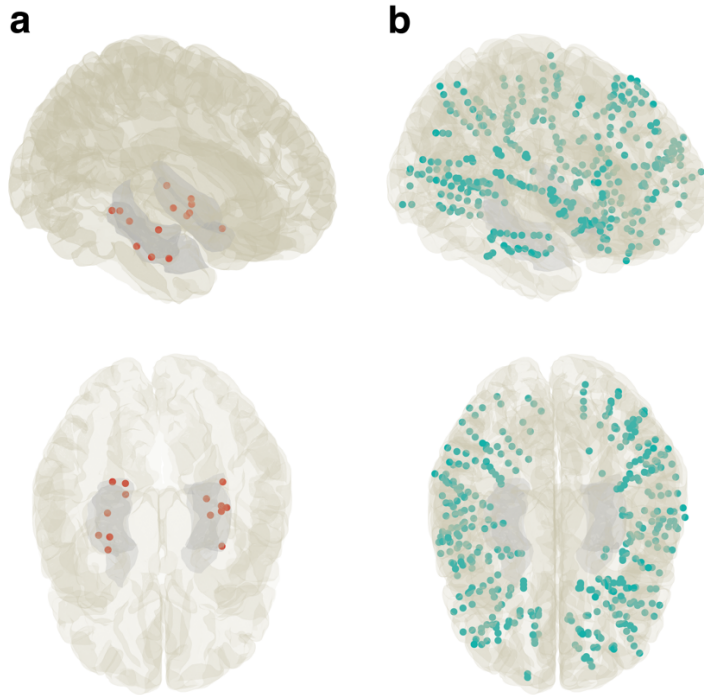

1026  
1027  
1028  
1029  
1030  
1031  
1032  
1033

Supplementary Figure 6. (a) Group-level (N = 7) electrode coverage in MNI space of intracranial electrodes in the MTL (comprising contacts in the hippocampus, parahippocampus and entorhinal cortex; N = 14; red). Group-level (N = 10) electrode coverage in MNI space of intracranial electrodes in non-MTL cortical areas (N = 14; 157 frontal; 55 parietal, 121 temporal, 42 occipital contacts).

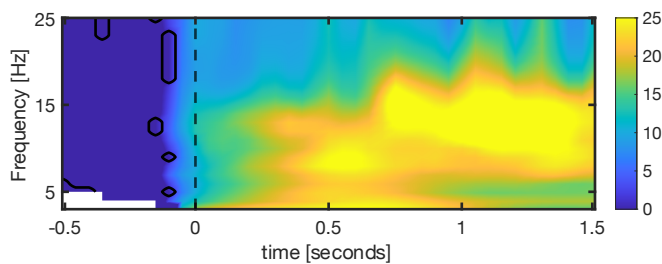

1034  
1035  
1036  
1037  
1038  
1039  
1040  
1041

Supplementary Figure 7. Time-frequency representation difference map of high and low SO-spindle activity trials. Oscillatory power was significantly higher for all time and frequency bins starting around cue onset for high power trials. Note the low frequency activity around 500 ms and subsequent spindle activity standing out (12-16Hz;  $p < 0.00001$ , corrected for multiple comparisons across time and frequency).

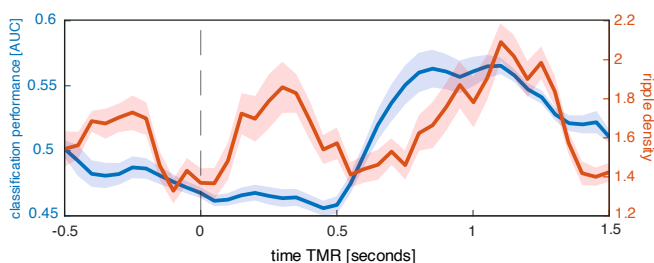

1042  
1043  
1044  
1045  
1046  
1047  
1048

Supplementary Figure 8. Time course of ripple density and reactivation signal. Blue: Classification output averaged across the relevant retrieval time [-150 to 200 ms]. Red: Patient-averaged ripple density across time.

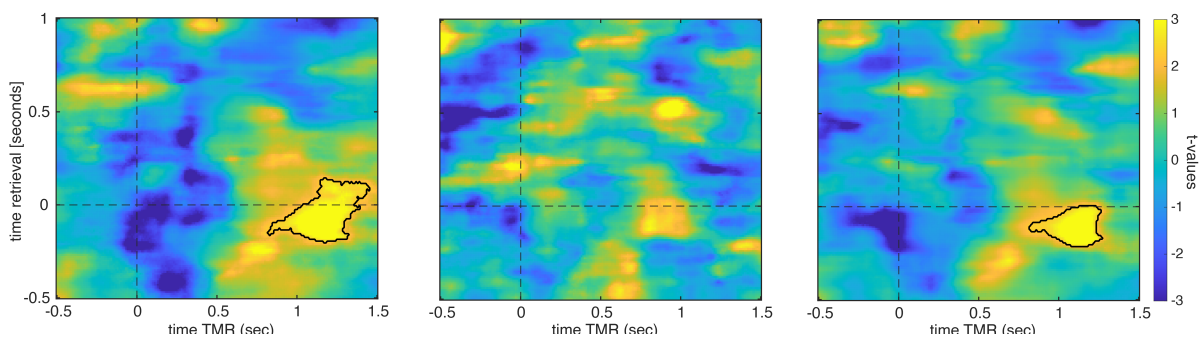

1049  
1050  
1051  
1052  
1053  
1054  
1055  
1056  
1057  
1058  
1059  
1060  
1061  
1062

Supplementary Figure 9. (left) Classification using TMR trials exhibiting increased levels of activity in the SO-spindle range. Retrieval-related brain patterns (left vs. right head orientations) were reliably decodable during 'high power' TMR trials (contour lines indicate the extent of the significant cluster,  $p = 0.004$  corrected; color range (blue to yellow) represents t values against chance level performance (i.e., 0.5)). (middle) Classification using TMR trials exhibiting low levels of activity in the SO-spindle range. Retrieval-related brain patterns (left vs. right head orientations) were not decodable during 'low power' TMR trials (contour lines indicate the extent of the significant cluster,  $p = 0.71$  corrected; color range (blue to yellow) represents t values against chance level performance (i.e., 0.5)). (right) Classification using all TMR trials (irrespective of SO-spindle power). Retrieval-related brain patterns (left vs. right head orientations) were reliably decodable during 'high power' TMR trials (contour lines indicate the extent of the significant cluster,  $p = 0.047$  corrected; color range (blue to yellow) represents t values against chance level performance (i.e., 0.5)).

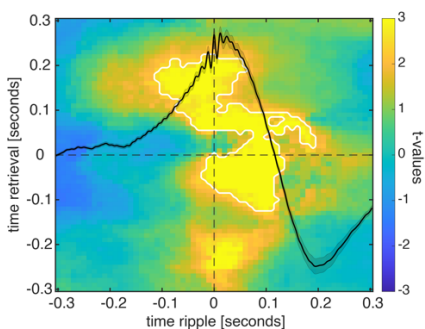

1063  
1064  
1065  
1066  
1067  
1068  
1069  
1070

Supplementary Figure 10. Retrieval-related brain patterns (left vs. right head orientations) were decodable during the presence of spindle locked MTL ripple when tested against chance level (i.e., 0.5; contour lines indicate the extent of the significant cluster,  $p = 0.007$  corrected; color range (blue to yellow) represents t values).

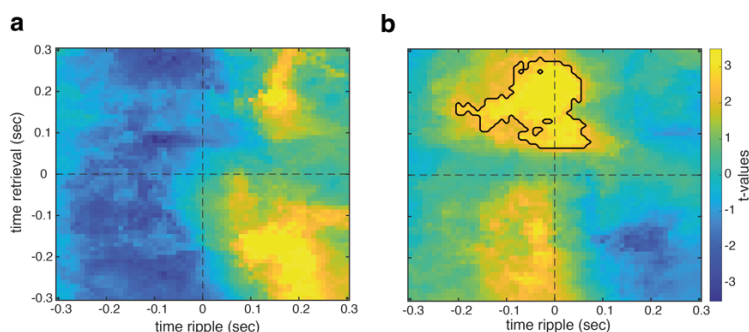

1071  
1072  
1073  
1074  
1075  
1076  
1077

Supplementary Figure 11. (a) Retrieval-related brain patterns (left vs. right head orientations) were not decodable during the presence of uncoupled ripples (i.e., ripples without spindles;  $p = 0.073$ ). (b) Head orientation-related brain patterns (left vs. right) were decodable during TMR when contrasting data segments centered on spindle-locked ripples and uncoupled ripples (contour lines indicate the extent of the cluster,  $p = 0.032$  corrected; color range (blue to yellow) represents t values against chance level performance).



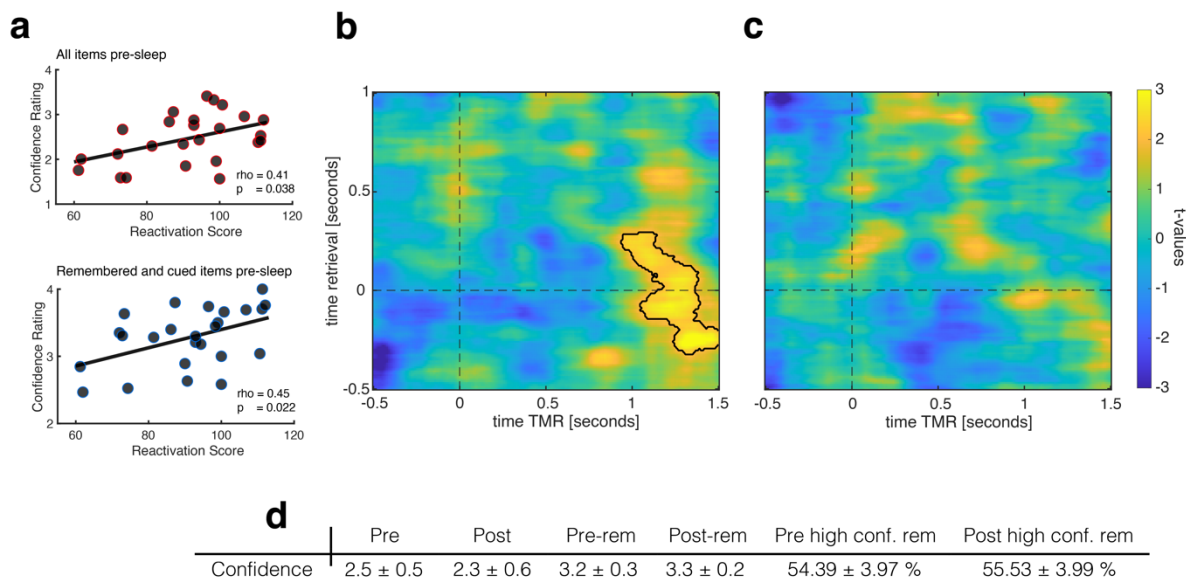

1078  
1079  
1080  
1081  
1082  
1083  
1084  
1085  
1086  
1087  
1088  
1089  
1090  
1091  
1092  
1093  
1094  
1095  
1096  
1097  
1098  
1099  
1100  
1101

Supplementary Figure 12. Relationship of confidence ratings and memory reactivation. In each retrieval trial, participants indicated how confident they were with their head orientation decision (scale from 0 corresponding to very uncertain to 4, very certain). **(a)** Participants' average confidence ratings across all trials correlated positively with the behavioral impact of TMR (i.e., reactivation score: relative difference from pre- to post- sleep for uncued items - relative difference from pre- to post- sleep for cued items \* 100) / pre-sleep remembered items;  $\rho = 0.41$ ;  $p = 0.038$ ). Likewise, participants' average confidence ratings across all remembered and cued trial correlated positively with the behavioral impact of TMR (i.e., reactivation score: relative difference from pre- to post- sleep for uncued items \* 100) / pre-sleep remembered items;  $\rho = 0.45$ ;  $p = 0.022$ ). These results suggest that highly confident participants rather benefitted from TMR, while less confident participants exhibited a detrimental effect of TMR. **(b)** Classification using only high confidence trials (confidence rating = 4) as training data. Retrieval-related brain patterns (left vs. right head orientations) were reliably decodable when the decoder was trained on high confidence trials (contour lines indicate the extent of the significant cluster,  $p = 0.025$  corrected; color range (blue to yellow) represents t values against chance level performance (i.e., 0.5)). **(c)** Classification using lower confidence trials (confidence rating < 4) as training data. Retrieval-related brain patterns (left vs. right head orientations) were not decodable when the decoder was trained on lower confidence trials ( $p = 0.96$  corrected; color range (blue to yellow) represents t values against chance level performance (i.e., 0.5)). **(d)** Descriptives of confidence ratings: Means and SEM of confidence ratings of all pre-sleep trials [Pre], all post sleep trials [Post], all remembered pre-sleep trials [Pre-rem] and all remembered post sleep trials [Post-rem]. Percentage of high confidence trials of all remembered trials in the pre-sleep memory test [Pre high conf. rem] and percentage of high confidence trials of all remembered trials in the post-sleep memory test [Post high conf. rem].

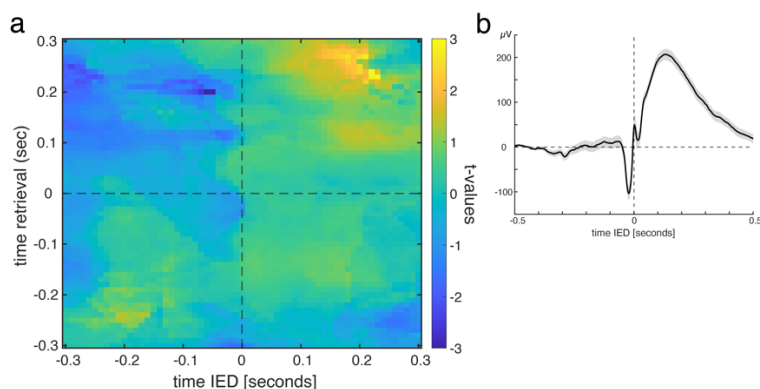

1102  
1103  
1104  
1105  
1106  
1107  
1108  
1109  
1110  
1111

Supplementary Figure 13. Interictal epileptiform discharge (IED) triggered classification. IEDs were automatically detected in MTL contacts of discarded data segments using established algorithms<sup>17</sup>. All intracranial EEG segments were centered around IEDs emerging 700 to 1400 ms after stimulus onset (i.e., same convention as in the ripple-triggered classification). **(a)** Training a classifier on the pooled associative retrieval data from both pre- and post-sleep sessions [-0.5 to 1s] and testing on the IED centered intracranial EEG data did not yield any significant result when tested against chance level performance (i.e., 0.5;  $p = 0.71$ ). **(b)** Single subject example of IED centered ERP.

1111

|                 | N1        | N2         | SWS        | REM        | WASO        | TST [min]   |
|-----------------|-----------|------------|------------|------------|-------------|-------------|
| Sleep stage [%] | 4.1 ± 0.5 | 46.8 ± 1.4 | 22.6 ± 1.0 | 21.0 ± 1.2 | 0.04 ± 0.01 | 421.4 ± 9.7 |

1112

1113

Supplementary Table 1. Sleep characteristics EEG study. Data are means ± s.e.m. N1, N2: NREM sleep stages N1 & N2, SWS: slow-wave sleep, REM: rapid eye movement sleep, WASO: wake after sleep onset.

1114

1115

1116

|                 | N1        | N2         | SWS        | REM        | WASO      | TST [min]    |
|-----------------|-----------|------------|------------|------------|-----------|--------------|
| Sleep stage [%] | 4.1 ± 0.9 | 44.9 ± 2.7 | 20.6 ± 2.5 | 23.1 ± 2.0 | 5.2 ± 1.7 | 480.3 ± 31.4 |

1117

1118

Supplementary Table 2. Sleep characteristics iEEG study. Data are means ± s.e.m. N1, N2: NREM sleep stages N1 & N2, SWS: slow-wave sleep, REM: rapid eye movement sleep, WASO: wake after sleep onset.

1119

1120

1121

1122

|     |          |
|-----|----------|
| P_1 | Parietal |
| P_2 | Temporal |
| P_3 | Parietal |
| P_4 | Parietal |
| P_5 | Frontal  |
| P_6 | Frontal  |
| P_7 | Frontal  |

1123

1124

Supplementary Table 3. Location of cortical contact exhibiting the strongest power in the spindle band (12-15 Hz)

1125
